# Supplementary material
Source: PubMed Central journal article supplement (PMC4749481)
Supplement: NIHMS701878-supplement-Supp_FigureS1-S4.pdf [file NIHMS701878-supplement-Supp_FigureS1-S4.pdf]

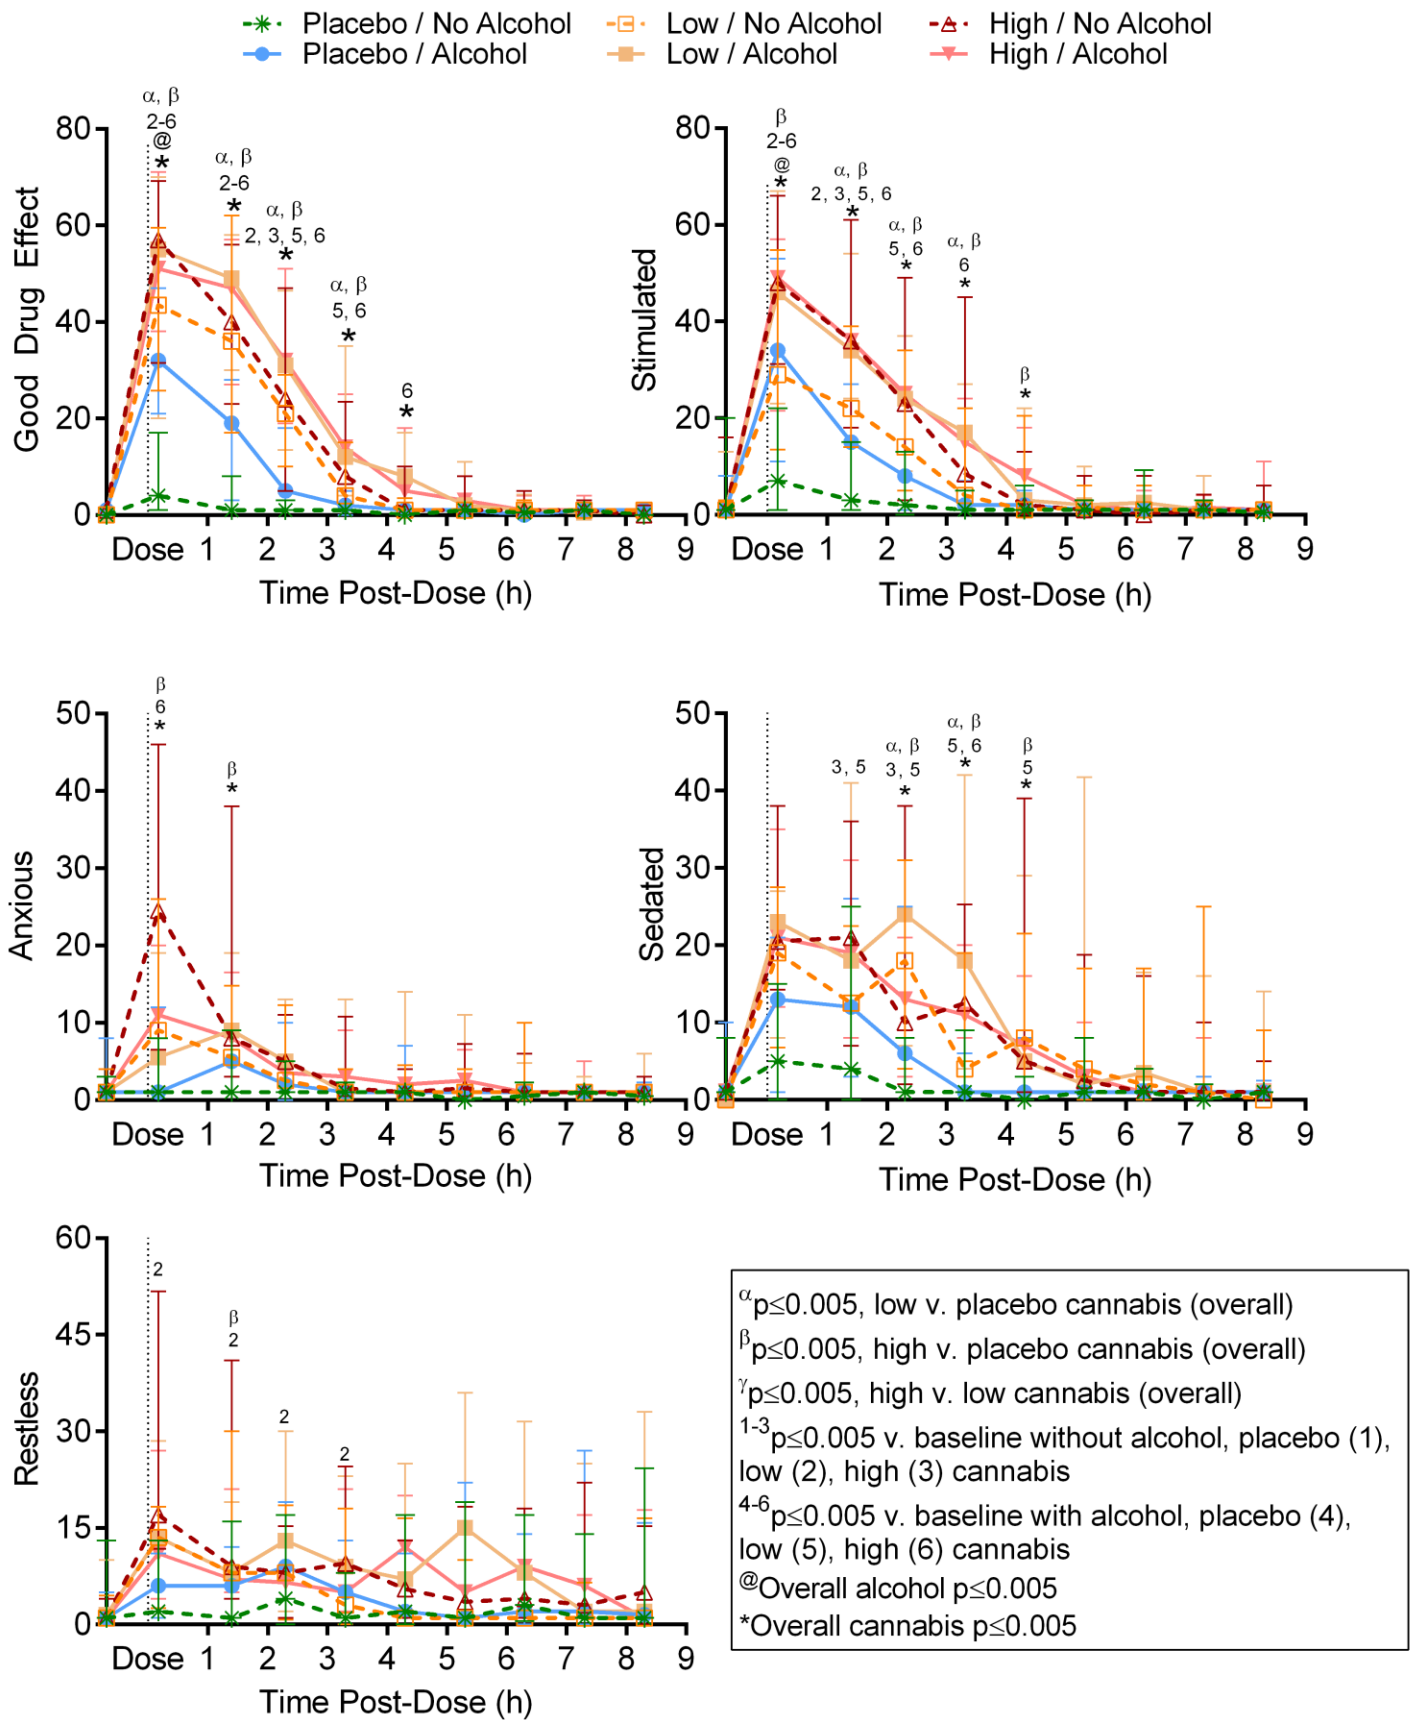

Supplemental Figure 1. Median [interquartile range] subjective effects visual-analogue scales (VAS) results versus time in 19 participants after low (2.9% THC) and high (6.7% THC) vaporized cannabis doses with and without low-dose oral alcohol. Note y-axis scales vary by measure; all VAS were out of 100.

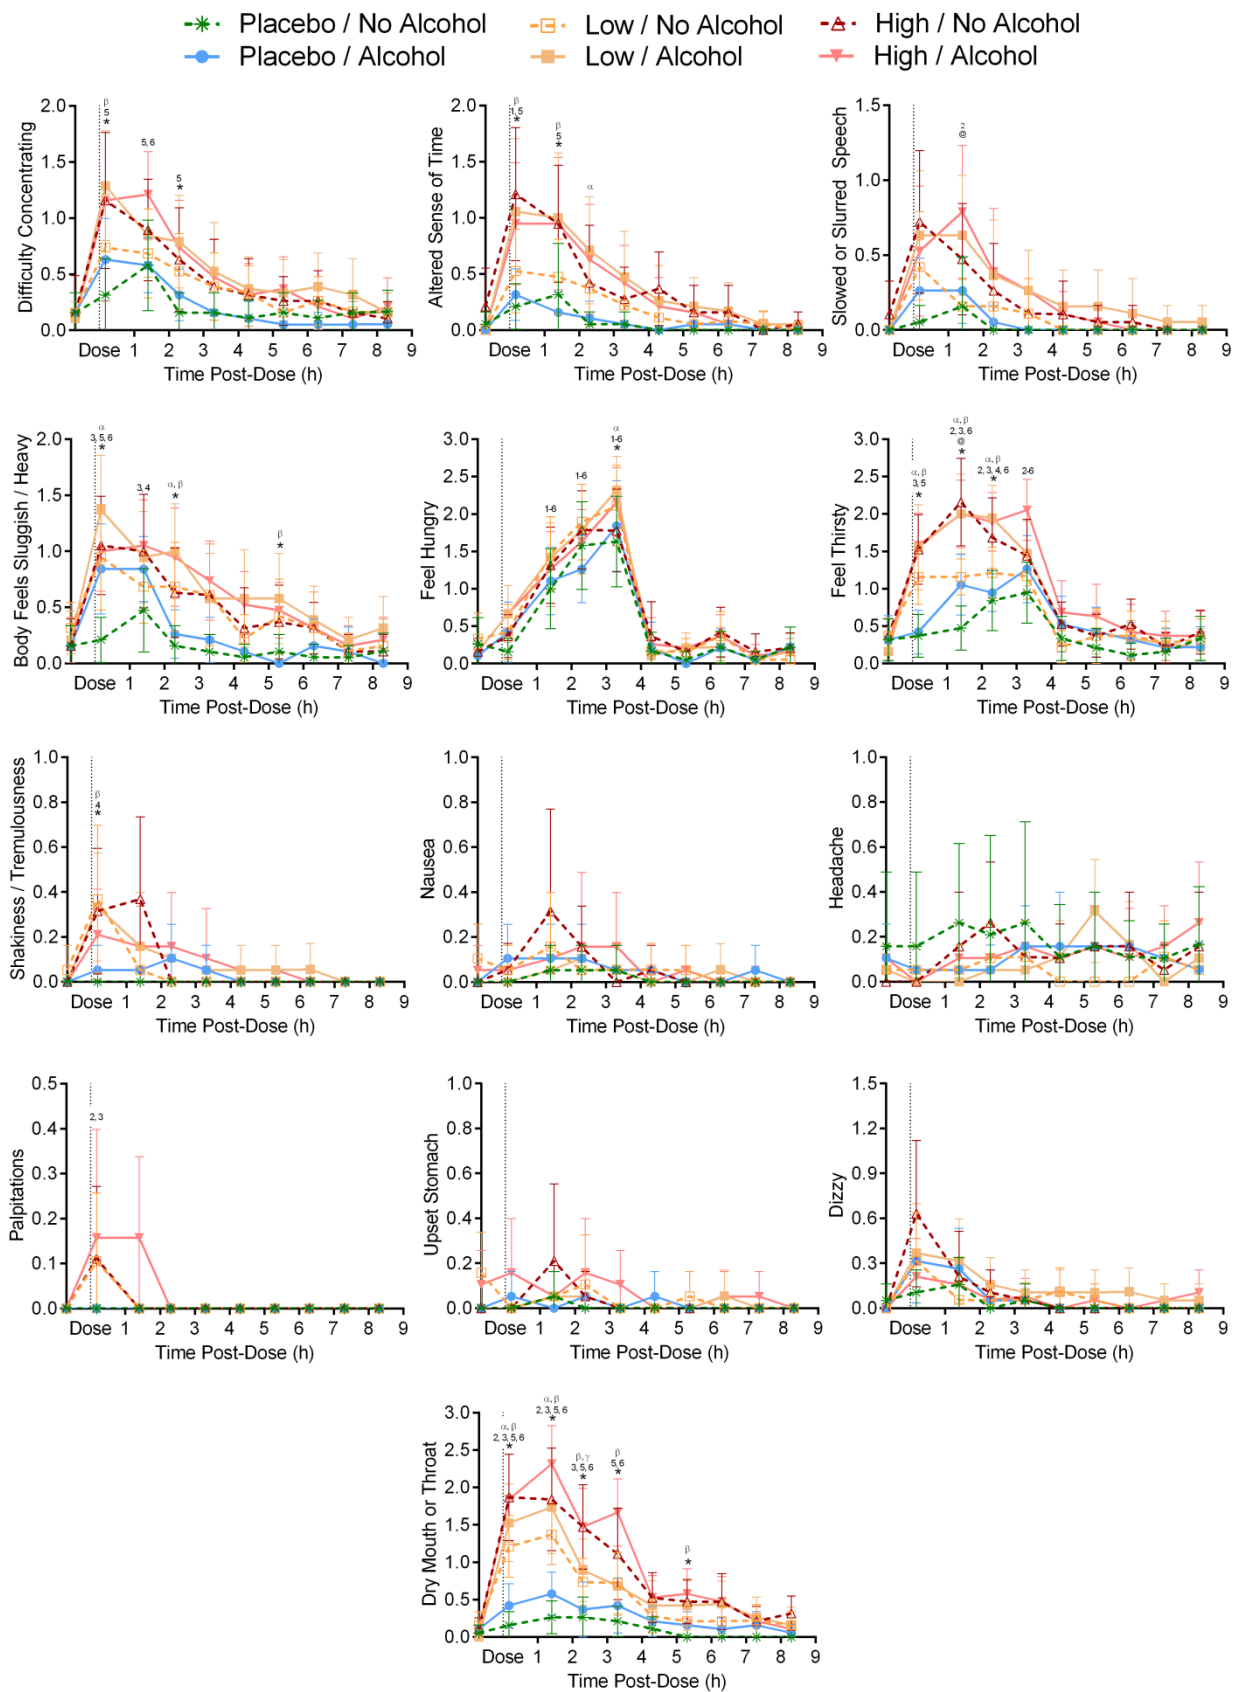

Supplemental Figure 2. Mean [95% confidence interval] 5-point subjective Likert scale results in 19 participants after placebo, low (2.9% THC) and high (6.7% THC) vaporized cannabis doses with and without low-dose oral alcohol. In participant responses, 0≡“None”, 1≡“Slight”, 2≡“Mild”, 3≡“Moderate”, and 4≡“Severe”.

\*Overall cannabis  $p \leq 0.005$  (significant with Bonferroni correction for ten measurements); <sup>0</sup>Overall alcohol  $p \leq 0.005$ ; <sup>a</sup> $p \leq 0.005$ , low versus placebo cannabis; <sup>b</sup> $p \leq 0.005$ , high versus placebo cannabis; <sup>c</sup> $p \leq 0.005$ , high versus low cannabis; <sup>1</sup> $p \leq 0.005$  versus baseline, placebo cannabis without alcohol; <sup>2</sup> $p \leq 0.005$  versus baseline, low cannabis without alcohol; <sup>3</sup> $p \leq 0.005$  versus baseline, high cannabis without alcohol; <sup>4</sup> $p \leq 0.005$  versus baseline, placebo cannabis with alcohol; <sup>5</sup> $p \leq 0.005$  versus baseline, low cannabis with alcohol; <sup>6</sup> $p \leq 0.005$  versus baseline, high cannabis with alcohol.

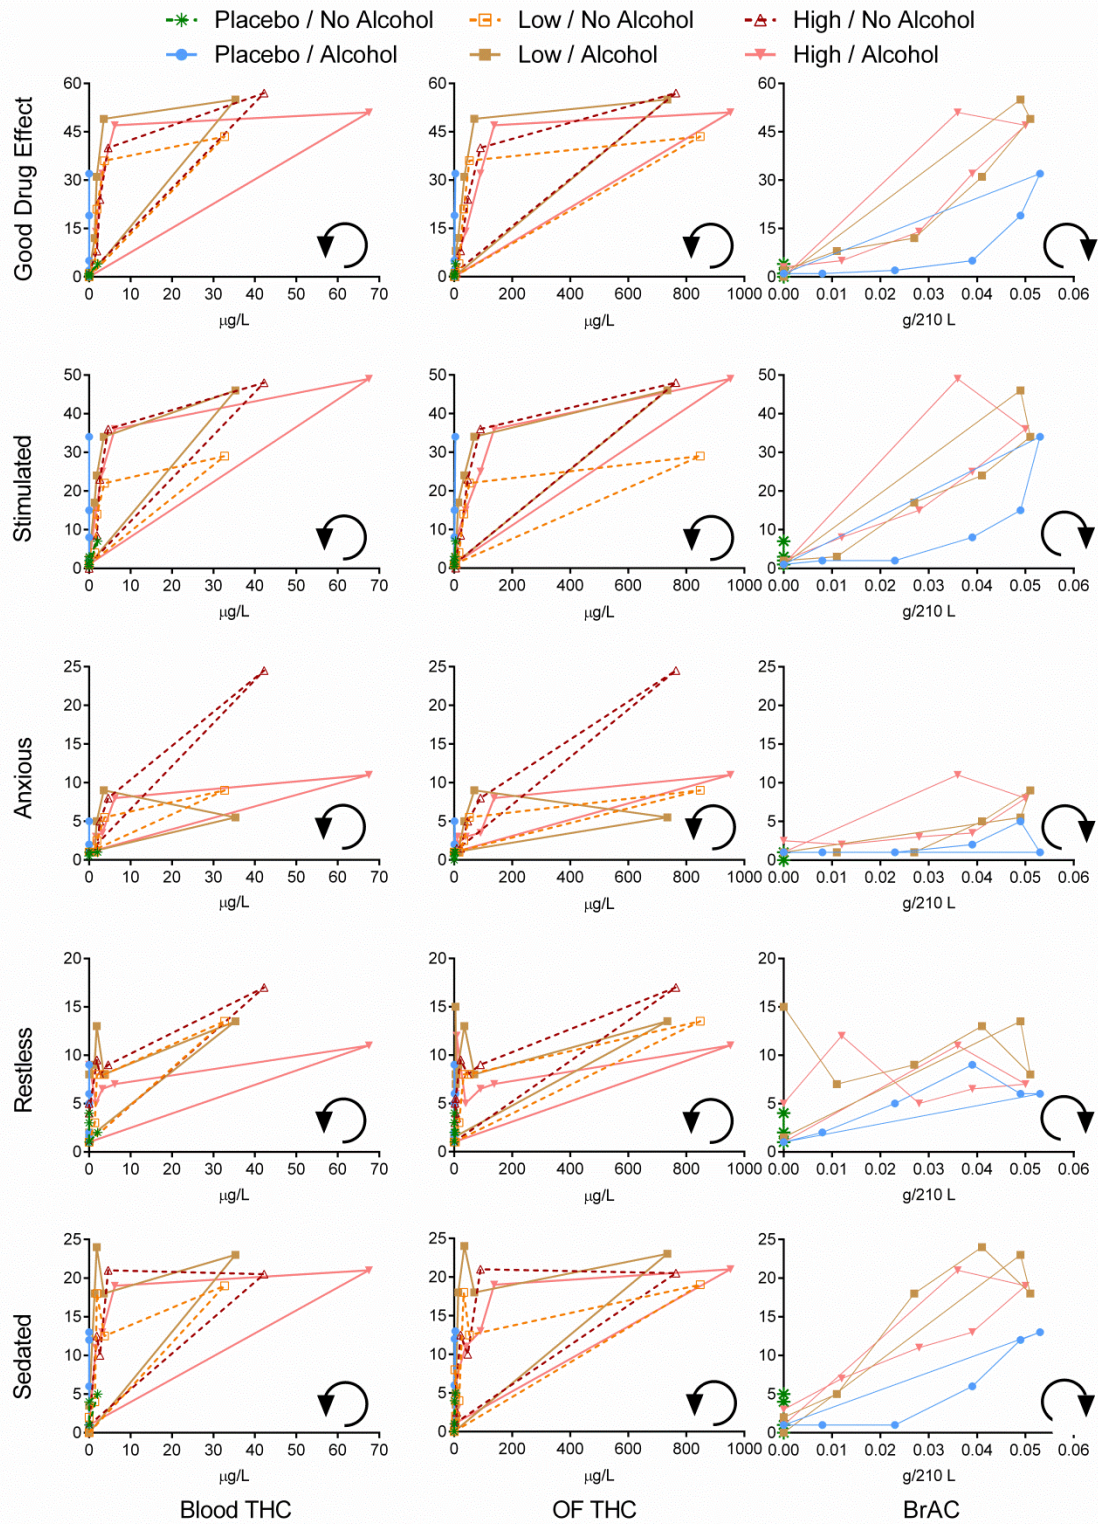

Supplemental Figure 3. Median subjective effects visual-analogue scales (VAS) results (“restless” and “sedated”) versus median blood  $\Delta^9$ -tetrahydrocannabinol (THC) concentrations, oral fluid (OF) THC, and breath alcohol concentration (BrAC) in 19 participants after placebo, low (2.9% THC) and high (6.7% THC) vaporized cannabis doses with and without low-dose oral alcohol. Counterclockwise and clockwise arrows represent hysteresis curve progressions over time.

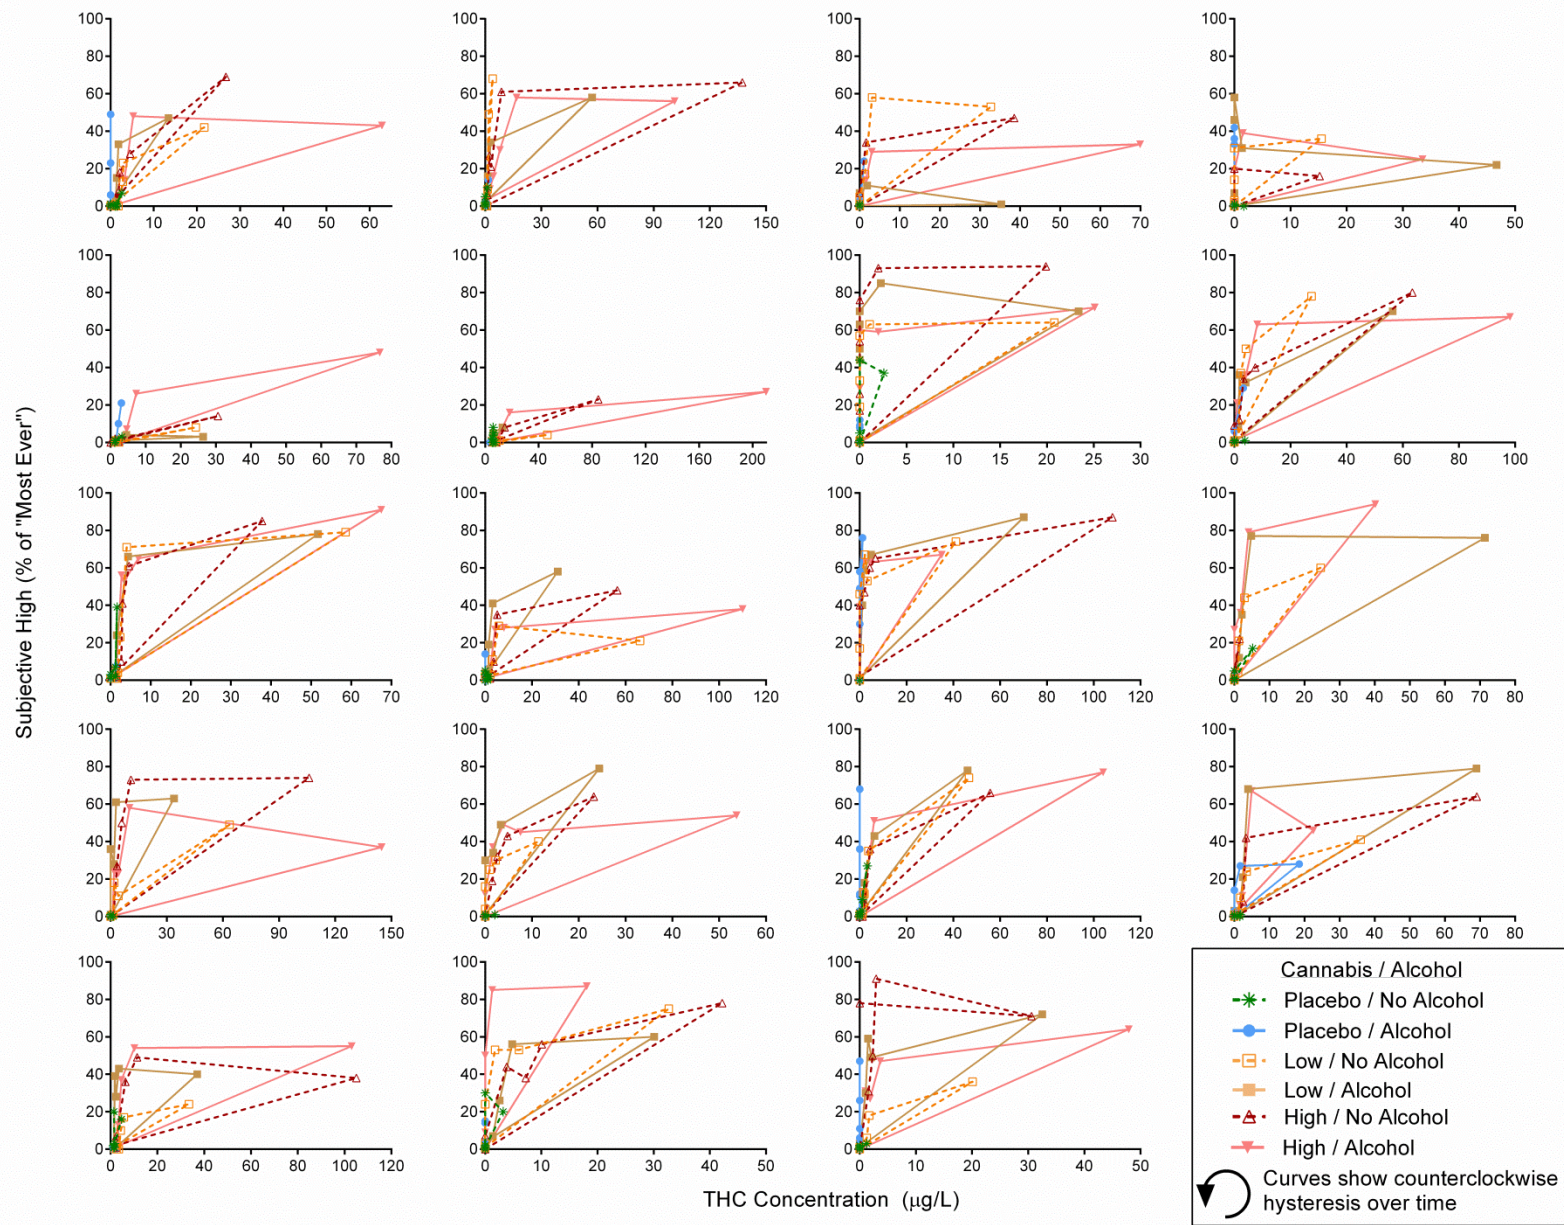

Supplemental Figure 4. Individual subjective “high” visual-analogue scales (VAS) results versus blood  $\Delta^9$ -tetrahydrocannabinol (THC) concentrations in 19 participants after low (2.9% THC) and high (6.7% THC) vaporized cannabis doses with and without low-dose oral alcohol. Counterclockwise arrows represent hysteresis curve progressions over time.
