# Supplementary material
Source: PubMed Central journal article supplement (PMC4749481)
Supplement: NIHMS701878-supplement-Supp_TableS1-S5.pdf [file NIHMS701878-supplement-Supp_TableS1-S5.pdf]

Supplemental Table 1. Overall effect of blood  $\Delta^9$ -tetrahydrocannabinol (THC) concentration ( $\mu\text{g/L}$ ), breath alcohol concentration (BrAC,  $\text{g}/210\text{L}$ ), time, and interactions (THC\*BrAC, time\*THC, time\*BrAC, time\*THC\*BrAC) on subjective effects in 19 healthy, occasional-to-moderate cannabis smokers following controlled vaporized cannabis administration with and without oral alcohol.

| Parameter                             | b      | SE <sub>b</sub> | df    | t    | p                | 95% Confidence Interval of b |             |
|---------------------------------------|--------|-----------------|-------|------|------------------|------------------------------|-------------|
|                                       |        |                 |       |      |                  | Lower Bound                  | Upper Bound |
| <i>Likert Feel Hungry</i>             |        |                 |       |      |                  |                              |             |
| <b>Intercept</b>                      | 0.435  | 0.197           | 32.9  | 2.2  | <b>0.035</b>     | 0.034                        | 0.836       |
| Blood THC                             |        |                 | 406.9 | -1.6 | 0.103            |                              |             |
| BrAC                                  |        |                 | 433.4 | 0.1  | 0.902            |                              |             |
| <b>Time</b>                           | 0.473  | 0.046           | 433.9 | 10.4 | <b>&lt;0.001</b> | 0.384                        | 0.563       |
| THC*BrAC                              |        |                 | 433.2 | 0.9  | 0.379            |                              |             |
| Time*THC                              |        |                 | 445.2 | 1.3  | 0.210            |                              |             |
| Time*BrAC                             |        |                 | 433.5 | -0.3 | 0.753            |                              |             |
| Time*THC*BrAC                         |        |                 | 433.8 | 0.4  | 0.659            |                              |             |
| <i>Likert Shakiness/Tremulousness</i> |        |                 |       |      |                  |                              |             |
| <b>Intercept</b>                      | 0.072  | 0.036           | 140.9 | 2.0  | <b>0.044</b>     | 0.002                        | 0.143       |
| <b>Blood THC</b>                      | 0.004  | 0.002           | 18.5  | 2.5  | <b>0.023</b>     | 0.001                        | 0.008       |
| BrAC                                  |        |                 | 547.2 | -0.4 | 0.682            |                              |             |
| <b>Time</b>                           | -0.016 | 0.008           | 547.6 | -2.1 | <b>0.037</b>     | -0.031                       | -0.001      |
| THC*BrAC                              |        |                 | 549.4 | 0.2  | 0.805            |                              |             |
| Time*THC                              |        |                 | 550.2 | 1.5  | 0.129            |                              |             |
| Time*BrAC                             |        |                 | 546.4 | 1.6  | 0.114            |                              |             |
| Time*THC*BrAC                         |        |                 | 545.4 | -0.2 | 0.846            |                              |             |
| <i>Likert Nausea</i>                  |        |                 |       |      |                  |                              |             |
| <b>Intercept</b>                      | 0.116  | 0.043           | 36.2  | 2.7  | <b>0.010</b>     | 0.030                        | 0.202       |
| <b>Blood THC</b>                      | -0.002 | 0.001           | 666.0 | -2.2 | <b>0.031</b>     | -0.004                       | 0.000       |
| BrAC                                  |        |                 | 657.0 | -1.4 | 0.151            |                              |             |
| <b>Time</b>                           | -0.019 | 0.004           | 657.4 | -4.2 | <b>&lt;0.001</b> | -0.028                       | -0.010      |
| THC*BrAC                              |        |                 | 658.6 | 0.9  | 0.369            |                              |             |
| <b>Time*THC</b>                       | 0.005  | 0.002           | 623.2 | 2.5  | <b>0.011</b>     | 0.001                        | 0.008       |
| Time*BrAC                             |        |                 | 656.6 | 1.8  | 0.067            |                              |             |
| Time*THC*BrAC                         |        |                 | 659.2 | -0.8 | 0.396            |                              |             |
| <i>Likert Headache</i>                |        |                 |       |      |                  |                              |             |
| <b>Intercept</b>                      | 0.172  | 0.057           | 42.4  | 3.0  | <b>0.004</b>     | 0.057                        | 0.286       |
| Blood THC                             |        |                 | 191.2 | -1.6 | 0.110            |                              |             |
| <b>BrAC</b>                           | -2.438 | 1.224           | 659.1 | -2.0 | <b>0.047</b>     | -4.841                       | -0.035      |
| Time                                  |        |                 | 659.4 | -0.7 | 0.471            |                              |             |
| THC*BrAC                              |        |                 | 661.2 | 0.0  | 0.964            |                              |             |
| Time*THC                              |        |                 | 618.3 | -0.3 | 0.782            |                              |             |
| Time*BrAC                             |        |                 | 658.8 | -0.1 | 0.891            |                              |             |
| Time*THC*BrAC                         |        |                 | 659.4 | 1.1  | 0.251            |                              |             |
| <i>Likert Palpitations</i>            |        |                 |       |      |                  |                              |             |
| Intercept                             |        |                 | 539.2 | 0.4  | 0.657            |                              |             |
| Blood THC                             |        |                 | 0.93  | 1.6  | 0.377            |                              |             |
| BrAC                                  |        |                 | 654.8 | 0.4  | 0.698            |                              |             |
| Time                                  |        |                 | 654.9 | -0.4 | 0.662            |                              |             |
| THC*BrAC                              |        |                 | 654.4 | -1.3 | 0.207            |                              |             |

|                             |               |        |       |       |      |              |        |        |
|-----------------------------|---------------|--------|-------|-------|------|--------------|--------|--------|
|                             | Time*THC      |        |       | 654.5 | 0.0  | 0.981        |        |        |
|                             | Time*BrAC     |        |       | 654.8 | -0.3 | 0.728        |        |        |
|                             | Time*THC*BrAC |        |       | 654.4 | 1.6  | 0.115        |        |        |
| <i>Likert Upset Stomach</i> |               |        |       |       |      |              |        |        |
|                             | Intercept     |        |       | 48.6  | 2.0  | 0.057        |        |        |
|                             | Blood THC     |        |       | 140.9 | -0.5 | 0.637        |        |        |
|                             | BrAC          |        |       | 657.4 | -0.8 | 0.400        |        |        |
| <b>Time</b>                 |               | -0.008 | 0.004 | 656.8 | -2.3 | <b>0.019</b> | -0.015 | -0.001 |
|                             | THC*BrAC      |        |       | 658.3 | 0.4  | 0.692        |        |        |
|                             | Time*THC      |        |       | 671.3 | 1.4  | 0.153        |        |        |
|                             | Time*BrAC     |        |       | 656.6 | 0.9  | 0.365        |        |        |
|                             | Time*THC*BrAC |        |       | 657.6 | 0.4  | 0.712        |        |        |

Data from 19 occasional-to-moderate cannabis smokers who participated in all dosing sessions. Subjective effects were measured by 100 mm visual-analogue scales (VAS) or 5-point Likert scales (Likert) with choices 0≡“none”, 1≡“slight”, 2≡“mild”, 3≡“moderate”, 4≡“severe” after drinking placebo or active alcohol (calculated to produce approximate peak 0.065% BrAC) and inhaling placebo, 2.9% THC, or 6.7% THC vaporized cannabis (500 mg, Volcano® Medic vaporizer).

Linear mixed model results; b is parameter (coefficient) estimate for each factor (negative b indicates the parameter decreases the subjective effect; positive b indicates the parameter increases the overall effect).

Overall equation: [Subjective Effect Result] = Intercept +  $b_{\text{Blood THC}} * [\text{THC}]_{\text{blood}}$  +  $b_{\text{BrAC}} * \text{BrAC}$  +  $b_{\text{Time}} * \text{post-dose time}$  +  $b_{\text{THC*BrAC}} * [\text{THC}]_{\text{blood}} * \text{BrAC}$  +  $b_{\text{Time*THC}} * \text{post-dose time} * [\text{THC}]_{\text{blood}}$  +  $b_{\text{Time*BrAC}} * \text{post-dose time} * \text{BrAC}$  +  $b_{\text{Time*THC*BrAC}} * \text{post-dose time} * [\text{THC}]_{\text{blood}} * \text{BrAC}$

<sup>a</sup>Values in **bold** are statistically significant (p<0.05); only significant predictors are considered in the final model.

Abbreviations: SE, standard error; df, degrees of freedom; VAS, visual-analogue scale; THC,  $\Delta^9$ -tetrahydrocannabinol; BrAC, breath alcohol concentration.

Supplemental Table 2. Overall effect of oral fluid (OF)  $\Delta^9$ -tetrahydrocannabinol (THC) concentration ( $\mu\text{g/L}$ ), breath alcohol concentration (BrAC,  $\text{g}/210\text{L}$ ), time, and interactions (THC\*BrAC, time\*THC, time\*BrAC, time\*THC\*BrAC) on subjective effects beginning 1.4h post-dose in 19 occasional-to-moderate cannabis smokers following controlled vaporized cannabis administration with and without oral alcohol.

| Parameter                             | b      | SE <sub>b</sub> | df     | t     | p <sup>a</sup>   | 95% Confidence Interval of b |             |
|---------------------------------------|--------|-----------------|--------|-------|------------------|------------------------------|-------------|
|                                       |        |                 |        |       |                  | Lower Bound                  | Upper Bound |
| <i>VAS Anxious</i>                    |        |                 |        |       |                  |                              |             |
| <b>Intercept</b>                      | 5.332  | 1.102           | 58.09  | 4.84  | <b>&lt;0.001</b> | 3.127                        | 7.537       |
| <b>OF THC</b>                         | 0.045  | 0.014           | 11.06  | 3.32  | <b>0.007</b>     | 0.015                        | 0.075       |
| BrAC                                  |        |                 | 869.16 | 1.50  | 0.133            |                              |             |
| <b>Time</b>                           | -0.370 | 0.128           | 866.25 | -2.88 | <b>0.004</b>     | -0.621                       | -0.118      |
| THC*BrAC                              |        |                 | 861.97 | -1.17 | 0.244            |                              |             |
| Time*THC                              |        |                 | 821.08 | -0.15 | 0.884            |                              |             |
| Time*BrAC                             |        |                 | 869.48 | 0.25  | 0.805            |                              |             |
| Time*THC*BrAC                         |        |                 | 852.98 | -0.78 | 0.433            |                              |             |
| Subject Variance in Intercepts (THC)  | 11.928 | 4.245           |        |       | <b>0.005</b>     | 5.938                        | 23.960      |
| Subject variance in Slopes (THC)      |        |                 |        |       | 0.176            |                              |             |
| ARH1 rho (slope-intercept covariance) | 0.682  | 0.174           |        |       | <b>&lt;0.000</b> | 0.191                        | 0.900       |
| <i>VAS Good Drug Effect</i>           |        |                 |        |       |                  |                              |             |
| <b>Intercept</b>                      | 16.427 | 1.904           | 52.38  | 8.63  | <b>&lt;0.001</b> | 12.608                       | 20.247      |
| <b>OF THC</b>                         | 0.222  | 0.057           | 7.31   | 3.92  | <b>0.005</b>     | 0.089                        | 0.354       |
| <b>BrAC</b>                           | 376.67 | 68.01           | 869.93 | 5.54  | <b>&lt;0.001</b> | 243.18                       | 510.15      |
| <b>Time</b>                           | -2.081 | 0.213           | 864.72 | -9.75 | <b>&lt;0.001</b> | -2.500                       | -1.662      |
| <b>THC*BrAC</b>                       | -0.698 | 0.299           | 860.75 | -2.33 | <b>0.020</b>     | -1.285                       | -0.111      |
| Time*THC                              |        |                 | 820.97 | -0.32 | 0.749            |                              |             |
| <b>Time*BrAC</b>                      | -75.40 | 29.06           | 853.06 | -2.59 | <b>0.010</b>     | -132.44                      | -18.35      |
| Time*THC*BrAC                         | -0.129 | 0.177           | 861.05 | -0.73 | 0.468            | -0.477                       | 0.219       |
| Subject Variance in Intercepts (THC)  | 37.956 | 13.375          |        |       | <b>0.005</b>     | 19.03                        | 75.73       |
| Subject variance in Slopes (THC)      |        |                 |        |       | 0.082            |                              |             |
| ARH1 rho (slope-intercept covariance) | 0.805  | 0.128           |        |       | <b>&lt;0.001</b> | 0.381                        | 0.950       |
| <i>VAS High</i>                       |        |                 |        |       |                  |                              |             |
| <b>Intercept</b>                      | 15.33  | 1.80            | 59.87  | 8.53  | <b>&lt;0.001</b> | 11.73                        | 18.92       |
| <b>OF THC</b>                         | 0.373  | 0.117           | 10.50  | 3.20  | <b>0.009</b>     | 0.115                        | 0.632       |
| <b>BrAC</b>                           | 296.40 | 66.95           | 854.38 | 4.43  | <b>0.000</b>     | 164.99                       | 427.81      |
| <b>Time</b>                           | -1.994 | 0.211           | 860.70 | -9.47 | <b>0.000</b>     | -2.407                       | -1.581      |
| <b>THC*BrAC</b>                       | -0.583 | 0.295           | 858.67 | -1.98 | <b>0.048</b>     | -1.162                       | -0.004      |
| Time*THC                              |        |                 | 862.55 | -0.55 | 0.580            |                              |             |
| <b>Time*BrAC</b>                      | -65.08 | 28.50           | 849.15 | -2.28 | <b>0.023</b>     | -121.02                      | -9.15       |
| Time*THC*BrAC                         |        |                 | 866.18 | -0.26 | 0.794            |                              |             |
| Subject Variance in Intercepts (THC)  | 31.076 | 11.110          |        |       | <b>0.005</b>     | 15.421                       | 62.622      |
| Subject variance in Slopes (THC)      | 0.242  | 0.111           |        |       | <b>0.030</b>     | 0.098                        | 0.597       |
| ARH1 rho (slope-intercept covariance) | 0.555  | 0.186           |        |       | <b>0.003</b>     | 0.099                        | 0.819       |
| <i>VAS Restless</i>                   |        |                 |        |       |                  |                              |             |
| <b>Intercept</b>                      | 10.97  | 2.36            | 41.71  | 4.65  | <b>&lt;0.001</b> | 6.21                         | 15.73       |
| OF THC                                |        |                 | 93.04  | 1.84  | 0.069            |                              |             |
| BrAC                                  |        |                 | 810.57 | -0.29 | 0.770            |                              |             |
| Time                                  |        |                 | 869.52 | 0.16  | 0.871            |                              |             |
| THC*BrAC                              |        |                 | 819.76 | -0.73 | 0.467            |                              |             |

|                                        |               |       |        |        |                |              |        |        |
|----------------------------------------|---------------|-------|--------|--------|----------------|--------------|--------|--------|
|                                        | Time*THC      |       |        | 887.55 | -0.38          | 0.704        |        |        |
|                                        | Time*BrAC     |       |        | 872.48 | 0.57           | 0.566        |        |        |
|                                        | Time*THC*BrAC |       |        | 875.57 | 0.03           | 0.977        |        |        |
| Subject Variance in Intercepts (THC)   | 67.08         | 23.06 |        |        |                | <b>0.004</b> | 34.20  | 131.59 |
| Subject variance in Slopes (THC)       |               |       |        |        |                | 0.311        |        |        |
| ARH1 rho (slope-intercept covariance)  |               |       |        |        |                | 0.541        |        |        |
| <i>VAS Sedated</i>                     |               |       |        |        |                |              |        |        |
| <b>Intercept</b>                       | 17.21         | 3.08  | 29.43  | 5.60   | < <b>0.001</b> | 10.92        | 23.50  |        |
|                                        | OF THC        |       | 59.47  | 0.57   | 0.570          |              |        |        |
|                                        | BrAC          |       | 830.58 | 0.63   | 0.528          |              |        |        |
| <b>Time</b>                            | -1.26         | 0.24  | 875.41 | -5.16  | < <b>0.001</b> | -1.73        | -0.78  |        |
|                                        | THC*BrAC      |       | 831.80 | 0.48   | 0.631          |              |        |        |
|                                        | Time*THC      |       | 886.81 | 0.58   | 0.563          |              |        |        |
|                                        | Time*BrAC     |       | 877.81 | 0.71   | 0.478          |              |        |        |
|                                        | Time*THC*BrAC |       | 882.50 | -1.75  | 0.081          |              |        |        |
| Subject Variance in Intercepts (THC)   | 140.12        | 46.80 |        |        |                | <b>0.003</b> | 72.81  | 269.65 |
| Subject variance in Slopes (THC)       |               |       |        |        |                | 0.333        |        |        |
| ARH1 rho (slope-intercept covariance)  | -0.699        | 0.222 |        |        |                | <b>0.002</b> | -0.938 | -0.015 |
| <i>VAS Stimulated</i>                  |               |       |        |        |                |              |        |        |
| <b>Intercept</b>                       | 16.37         | 2.05  | 37.02  | 7.97   | < <b>0.001</b> | 12.21        | 20.53  |        |
| <b>OF THC</b>                          | 0.219         | 0.075 | 5.10   | 2.93   | <b>0.032</b>   | 0.028        | 0.411  |        |
| <b>BrAC</b>                            | 222.54        | 61.77 | 840.77 | 3.60   | <b>0.000</b>   | 101.29       | 343.79 |        |
| <b>Time</b>                            | -1.799        | 0.194 | 855.59 | -9.27  | < <b>0.001</b> | -2.180       | -1.418 |        |
|                                        | THC*BrAC      |       | 824.85 | -1.53  | 0.126          |              |        |        |
|                                        | Time*THC      |       | 840.19 | 0.19   | 0.853          |              |        |        |
|                                        | Time*BrAC     |       | 827.69 | -1.92  | 0.055          |              |        |        |
|                                        | Time*THC*BrAC |       | 833.83 | -1.26  | 0.209          |              |        |        |
| Subject Variance in Intercepts (THC)   | 54.51         | 18.57 |        |        |                | <b>0.003</b> | 27.96  | 106.28 |
| Subject variance in Slopes (THC)       |               |       |        |        |                | 0.141        |        |        |
| ARH1 rho (slope-intercept covariance)  | 0.564         | 0.176 |        |        |                | <b>0.001</b> | 0.133  | 0.816  |
| <i>VAS Stoned</i>                      |               |       |        |        |                |              |        |        |
| <b>Intercept</b>                       | 14.67         | 2.21  | 39.74  | 6.63   | < <b>0.001</b> | 10.20        | 19.13  |        |
| <b>OF THC</b>                          | 0.280         | 0.093 | 6.46   | 3.01   | <b>0.022</b>   | 0.057        | 0.503  |        |
| <b>BrAC</b>                            | 283.22        | 69.37 | 841.69 | 4.08   | < <b>0.001</b> | 147.05       | 419.38 |        |
| <b>Time</b>                            | -1.740        | 0.217 | 853.57 | -8.00  | < <b>0.001</b> | -2.167       | -1.314 |        |
|                                        | THC*BrAC      |       | 833.62 | -1.63  | 0.102          |              |        |        |
|                                        | Time*THC      |       | 844.07 | -0.80  | 0.426          |              |        |        |
| <b>Time*BrAC</b>                       | -76.84        | 29.67 | 834.59 | -2.59  | <b>0.010</b>   | -135.07      | -18.60 |        |
|                                        | Time*THC*BrAC |       | 839.33 | -0.68  | 0.499          |              |        |        |
| Subject Variance in Intercepts (THC)   | 60.63         | 20.77 |        |        |                | <b>0.004</b> | 30.98  | 118.67 |
| Subject variance in Slopes (THC)       |               |       |        |        |                | 0.100        |        |        |
| ARH1 rho (slope-intercept covariance)  |               |       |        |        |                | 0.615        |        |        |
| <i>Likert Difficulty Concentrating</i> |               |       |        |        |                |              |        |        |
| <b>Intercept</b>                       | 0.514         | 0.092 | 32.69  | 5.57   | < <b>0.001</b> | 0.326        | 0.702  |        |
|                                        | OF THC        |       | 6.91   | 2.12   | 0.072          |              |        |        |
| <b>BrAC</b>                            | 7.86          | 2.55  | 876.67 | 3.08   | <b>0.002</b>   | 2.86         | 12.87  |        |
| <b>Time</b>                            | -0.052        | 0.008 | 870.90 | -6.46  | < <b>0.001</b> | -0.067       | -0.036 |        |
|                                        | THC*BrAC      |       | 850.03 | 0.48   | 0.632          |              |        |        |
|                                        | Time*THC      |       | 857.74 | 0.79   | 0.432          |              |        |        |

|                                         |               |         |  |        |       |                  |         |         |
|-----------------------------------------|---------------|---------|--|--------|-------|------------------|---------|---------|
|                                         | Time*BrAC     |         |  | 863.12 | -1.88 | 0.061            |         |         |
|                                         | Time*THC*BrAC |         |  | 852.98 | -0.40 | 0.693            |         |         |
| Subject Variance in Intercepts (THC)    | 0.119         | 0.040   |  |        |       | <b>0.003</b>     | 0.061   | 0.230   |
| Subject variance in Slopes (THC)        |               |         |  |        |       | 0.147            |         |         |
| ARH1 rho (slope-intercept covariance)   | 0.549         | 0.178   |  |        |       | <b>0.002</b>     | 0.116   | 0.807   |
| <i>Likert Altered Sense of Time</i>     |               |         |  |        |       |                  |         |         |
| <b>Intercept</b>                        | 0.334         | 0.071   |  | 49.98  | 4.68  | <b>&lt;0.001</b> | 0.191   | 0.478   |
| <b>OF THC</b>                           | 0.005         | 0.002   |  | 12.06  | 2.35  | <b>0.037</b>     | 0.000   | 0.010   |
| <b>BrAC</b>                             | 5.605         | 2.503   |  | 881.85 | 2.24  | <b>0.025</b>     | 0.693   | 10.517  |
| <b>Time</b>                             | -0.044        | 0.008   |  | 874.51 | -5.56 | <b>&lt;0.001</b> | -0.059  | -0.028  |
|                                         | THC*BrAC      |         |  | 875.97 | -1.03 | 0.302            |         |         |
|                                         | Time*THC      |         |  | 719.54 | 0.24  | 0.807            |         |         |
|                                         | Time*BrAC     |         |  | 874.10 | -0.95 | 0.343            |         |         |
|                                         | Time*THC*BrAC |         |  | 839.79 | -0.10 | 0.919            |         |         |
| Subject Variance in Intercepts (THC)    | 0.055         | 0.019   |  |        |       | <b>0.004</b>     | 0.028   | 0.109   |
| Subject variance in Slopes (THC)        | 0.000         | 0.000   |  |        |       | <b>0.022</b>     | 0.000   | 0.000   |
| ARH1 rho (slope-intercept covariance)   | 0.922         | 0.060   |  |        |       | <b>&lt;0.001</b> | 0.674   | 0.983   |
| <i>Likert Slowed/Slurred Speech</i>     |               |         |  |        |       |                  |         |         |
| <b>Intercept</b>                        | 0.141         | 0.045   |  | 85.37  | 3.14  | <b>0.002</b>     | 0.052   | 0.230   |
|                                         | OF THC        |         |  | 14.87  | 1.73  | 0.104            |         |         |
| <b>BrAC</b>                             | 5.748         | 1.859   |  | 875.26 | 3.09  | <b>0.002</b>     | 2.100   | 9.396   |
| <b>Time</b>                             | -0.019        | 0.006   |  | 875.46 | -3.25 | <b>0.001</b>     | -0.030  | -0.008  |
|                                         | THC*BrAC      |         |  | 874.56 | 1.18  | 0.239            |         |         |
|                                         | Time*THC      |         |  | 875.67 | 0.01  | 0.993            |         |         |
|                                         | Time*BrAC     |         |  | 874.96 | -1.22 | 0.223            |         |         |
|                                         | Time*THC*BrAC |         |  | 874.66 | -1.45 | 0.147            |         |         |
| Subject Variance in Intercepts (THC)    | 0.015         | 0.006   |  |        |       | <b>0.009</b>     | 0.007   | 0.032   |
| Subject variance in Slopes (THC)        | 0.00014       | 0.00006 |  |        |       | <b>0.021</b>     | 0.00006 | 0.00032 |
| ARH1 rho (slope-intercept covariance)   |               |         |  |        |       | --               |         |         |
| <i>Likert Body Feels Sluggish/Heavy</i> |               |         |  |        |       |                  |         |         |
| <b>Intercept</b>                        | 0.574         | 0.091   |  | 48.11  | 6.32  | <b>&lt;0.001</b> | 0.391   | 0.757   |
|                                         | OF THC        |         |  | 11.29  | 1.71  | 0.115            |         |         |
| <b>BrAC</b>                             | 7.502         | 3.152   |  | 881.42 | 2.38  | <b>0.018</b>     | 1.316   | 13.687  |
| <b>Time</b>                             | -0.058        | 0.010   |  | 874.12 | -5.91 | <b>&lt;0.001</b> | -0.078  | -0.039  |
|                                         | THC*BrAC      |         |  | 873.41 | -0.20 | 0.842            |         |         |
|                                         | Time*THC      |         |  | 875.71 | 1.32  | 0.188            |         |         |
|                                         | Time*BrAC     |         |  | 877.21 | -0.60 | 0.546            |         |         |
|                                         | Time*THC*BrAC |         |  | 867.94 | -0.96 | 0.338            |         |         |
| Subject Variance in Intercepts (THC)    | 0.091         | 0.032   |  |        |       | <b>0.004</b>     | 0.046   | 0.181   |
| Subject variance in Slopes (THC)        |               |         |  |        |       | 0.225            |         |         |
| ARH1 rho (slope-intercept covariance)   |               |         |  |        |       | 0.386            |         |         |
| <i>Likert Feel Thirsty</i>              |               |         |  |        |       |                  |         |         |
| <b>Intercept</b>                        | 1.142         | 0.112   |  | 48.47  | 10.22 | <b>&lt;0.001</b> | 0.918   | 1.367   |
| <b>OF THC</b>                           | 0.004         | 0.001   |  | 12.40  | 2.88  | <b>0.013</b>     | 0.001   | 0.007   |
|                                         | BrAC          |         |  | 880.91 | -0.09 | 0.926            |         |         |
| <b>Time</b>                             | -0.128        | 0.012   |  | 875.64 | -10.6 | <b>&lt;0.001</b> | -0.152  | -0.104  |
|                                         | THC*BrAC      |         |  | 878.53 | 0.55  | 0.581            |         |         |
| <b>Time*THC</b>                         | 0.001         | 0.000   |  | 863.23 | 3.20  | <b>0.001</b>     | 0.000   | 0.002   |
| <b>Time*BrAC</b>                        | 5.565         | 1.660   |  | 878.88 | 3.35  | <b>0.001</b>     | 2.307   | 8.822   |

|                                            |        |        |        |       |                  |        |        |
|--------------------------------------------|--------|--------|--------|-------|------------------|--------|--------|
| <b>Time*THC*BrAC</b>                       | -0.024 | 0.010  | 873.11 | -2.35 | <b>0.019</b>     | -0.044 | -0.004 |
| Subject Variance in Intercepts (THC)       | 0.138  | 0.048  |        |       | <b>0.004</b>     | 0.069  | 0.272  |
| Subject variance in Slopes (THC)           |        |        |        |       | 0.136            |        |        |
| ARH1 rho (slope-intercept covariance)      | 0.598  | 0.256  |        |       | <b>0.020</b>     | -0.092 | 0.900  |
| <i>Likert Dizzy</i>                        |        |        |        |       |                  |        |        |
| <b>Intercept</b>                           | 0.082  | 0.027  | 197.43 | 3.01  | <b>0.003</b>     | 0.028  | 0.135  |
| OF THC                                     |        |        | 15.59  | 1.43  | 0.174            |        |        |
| <b>BrAC</b>                                | 4.408  | 1.277  | 864.60 | 3.45  | <b>0.001</b>     | 1.902  | 6.914  |
| <b>Time</b>                                | -0.009 | 0.004  | 863.05 | -2.22 | <b>0.027</b>     | -0.017 | -0.001 |
| THC*BrAC                                   |        |        | 875.78 | 0.13  | 0.895            |        |        |
| Time*THC                                   |        |        | 782.83 | -0.04 | 0.968            |        |        |
| <b>Time*BrAC</b>                           | -1.481 | 0.543  | 864.55 | -2.73 | <b>0.007</b>     | -2.547 | -0.415 |
| Time*THC*BrAC                              |        |        | 860.09 | -0.18 | 0.857            |        |        |
| Subject Variance in Intercepts (THC)       | 0.003  | 0.001  |        |       | <b>0.029</b>     | 0.001  | 0.007  |
| Subject variance in Slopes (THC)           | 0.0003 | 0.0001 |        |       | <b>0.007</b>     | 0.0001 | 0.0005 |
| ARH1 rho (slope-intercept covariance)      |        |        |        |       | 0.509            |        |        |
| <i>Likert Dry Mouth or Throat</i>          |        |        |        |       |                  |        |        |
| <b>Intercept</b>                           | 0.727  | 0.093  | 71.08  | 7.83  | <b>&lt;0.001</b> | 0.542  | 0.913  |
| <b>OF THC</b>                              | 0.013  | 0.005  | 9.79   | 2.54  | <b>0.030</b>     | 0.002  | 0.024  |
| BrAC                                       |        |        | 863.27 | 1.60  | 0.110            |        |        |
| <b>Time</b>                                | -0.084 | 0.011  | 868.02 | -7.33 | <b>&lt;0.001</b> | -0.107 | -0.062 |
| THC*BrAC                                   |        |        | 864.66 | 0.47  | 0.637            |        |        |
| <b>Time*THC</b>                            | 0.001  | 0.000  | 842.04 | 3.06  | <b>0.002</b>     | 0.000  | 0.002  |
| Time*BrAC                                  |        |        | 856.97 | -0.54 | 0.591            |        |        |
| Time*THC*BrAC                              |        |        | 865.39 | -0.98 | 0.326            |        |        |
| Subject Variance in Intercepts (THC)       | 0.074  | 0.027  |        |       | <b>0.006</b>     | 0.036  | 0.152  |
| Subject variance in Slopes (THC)           | 0.000  | 0.000  |        |       | <b>0.039</b>     | 0.000  | 0.001  |
| ARH1 rho (slope-intercept covariance)      | 0.628  | 0.169  |        |       | <b>0.000</b>     | 0.190  | 0.857  |
| <i>Likert Feel Hungry</i>                  |        |        |        |       |                  |        |        |
| <b>Intercept</b>                           | 1.771  | 0.123  | 57.82  | 14.41 | <b>&lt;0.001</b> | 1.525  | 2.017  |
| OF THC                                     |        |        | 896.47 | -1.67 | 0.096            |        |        |
| <b>BrAC</b>                                | -14.84 | 4.41   | 882.70 | -3.37 | <b>0.001</b>     | -23.49 | -6.19  |
| <b>Time</b>                                | -0.238 | 0.014  | 883.14 | -16.6 | <b>&lt;0.001</b> | -0.266 | -0.210 |
| THC*BrAC                                   |        |        | 889.20 | 1.45  | 0.148            |        |        |
| <b>Time*THC</b>                            | 0.001  | 0.000  | 899.57 | 2.83  | <b>0.005</b>     | 0.000  | 0.002  |
| <b>Time*BrAC</b>                           | 9.144  | 1.944  | 884.02 | 4.70  | <b>&lt;0.001</b> | 5.328  | 12.959 |
| Time*THC*BrAC                              |        |        | 895.64 | -1.88 | 0.060            |        |        |
| Subject Variance in Intercepts (THC)       | 0.150  | 0.053  |        |       | <b>0.005</b>     | 0.075  | 0.299  |
| Subject variance in Slopes (THC)           |        |        |        |       | 0.479            |        |        |
| ARH1 rho (slope-intercept covariance)      |        |        |        |       | --               |        |        |
| <i>Likert Feel Shakiness/Tremulousness</i> |        |        |        |       |                  |        |        |
| Intercept                                  |        |        | 810.68 | 1.66  | 0.097            |        |        |
| OF THC                                     |        |        | 0.27   | 1.37  | 0.650            |        |        |
| BrAC                                       |        |        | 879.36 | -0.38 | 0.702            |        |        |
| Time                                       |        |        | 876.77 | -1.45 | 0.149            |        |        |
| THC*BrAC                                   |        |        | 878.33 | -1.88 | 0.061            |        |        |
| Time*THC                                   |        |        | 878.42 | -0.48 | 0.628            |        |        |
| Time*BrAC                                  |        |        | 879.56 | 0.86  | 0.390            |        |        |
| <b>Time*THC*BrAC</b>                       | 0.0059 | 0.0027 | 878.26 | 2.14  | <b>0.033</b>     | 0.0005 | 0.0113 |

|                                       |         |        |        |       |                |              |        |       |
|---------------------------------------|---------|--------|--------|-------|----------------|--------------|--------|-------|
| Subject Variance in Intercepts (THC)  |         |        |        |       |                | 0.721        |        |       |
| Subject variance in Slopes (THC)      | 0.000   | 0.000  |        |       |                | <b>0.006</b> | 0.000  | 0.000 |
| ARH1 rho (slope-intercept covariance) |         |        |        |       |                | --           |        |       |
| <i>Likert Nausea</i>                  |         |        |        |       |                |              |        |       |
| <b>Intercept</b>                      | 0.126   | 0.032  | 93.30  | 3.88  | < <b>0.001</b> | 0.061        | 0.190  |       |
| OF THC                                |         |        | 251.26 | 1.01  | 0.315          |              |        |       |
| BrAC                                  |         |        | 886.90 | -0.82 | 0.414          |              |        |       |
| <b>Time</b>                           | -0.017  | 0.004  | 884.95 | -3.97 | < <b>0.001</b> | -0.026       | -0.009 |       |
| THC*BrAC                              |         |        | 891.21 | -0.89 | 0.374          |              |        |       |
| Time*THC                              |         |        | 896.37 | -0.35 | 0.728          |              |        |       |
| Time*BrAC                             |         |        | 886.58 | 0.54  | 0.591          |              |        |       |
| Time*THC*BrAC                         |         |        | 890.11 | 1.04  | 0.299          |              |        |       |
| Subject Variance in Intercepts (THC)  | 0.007   | 0.003  |        |       |                | <b>0.009</b> | 0.004  | 0.016 |
| Subject variance in Slopes (THC)      | 0.000   | 0.000  |        |       |                | <b>0.040</b> | 0.000  | 0.000 |
| ARH1 rho (slope-intercept covariance) |         |        |        |       |                | --           |        |       |
| <i>Likert Headache</i>                |         |        |        |       |                |              |        |       |
| <b>Intercept</b>                      | 0.168   | 0.056  | 70.65  | 3.01  | <b>0.004</b>   | 0.057        | 0.280  |       |
| OF THC                                |         |        | 892.32 | -0.56 | 0.578          |              |        |       |
| BrAC                                  |         |        | 881.93 | -1.38 | 0.169          |              |        |       |
| Time                                  |         |        | 882.26 | -1.17 | 0.241          |              |        |       |
| THC*BrAC                              |         |        | 892.35 | -0.54 | 0.586          |              |        |       |
| Time*THC                              |         |        | 898.44 | 0.85  | 0.393          |              |        |       |
| Time*BrAC                             |         |        | 884.07 | 0.30  | 0.761          |              |        |       |
| Time*THC*BrAC                         |         |        | 898.61 | 0.60  | 0.549          |              |        |       |
| Subject Variance in Intercepts (THC)  | 0.027   | 0.010  |        |       |                | <b>0.006</b> | 0.013  | 0.055 |
| Subject variance in Slopes (THC)      |         |        |        |       |                | 0.923        |        |       |
| ARH1 rho (slope-intercept covariance) |         |        |        |       |                | --           |        |       |
| <i>Likert Palpitations</i>            |         |        |        |       |                |              |        |       |
| <b>Intercept</b>                      | -0.012  | 0.005  | 411.13 | -2.27 | <b>0.024</b>   | -0.022       | -0.002 |       |
| OF THC                                |         |        | 7.33   | 1.52  | 0.171          |              |        |       |
| <b>BrAC</b>                           | 0.819   | 0.268  | 887.10 | 3.06  | <b>0.002</b>   | 0.294        | 1.345  |       |
| <b>Time</b>                           | 0.0018  | 0.0008 | 889.95 | 2.13  | <b>0.034</b>   | 0.0001       | 0.0034 |       |
| THC*BrAC                              |         |        | 883.82 | -1.17 | 0.243          |              |        |       |
| Time*THC                              |         |        | 886.13 | -1.31 | 0.192          |              |        |       |
| <b>Time*BrAC</b>                      | -0.255  | 0.114  | 885.69 | -2.24 | <b>0.025</b>   | -0.478       | -0.032 |       |
| Time*THC*BrAC                         |         |        | 884.81 | -0.07 | 0.947          |              |        |       |
| Subject Variance in Intercepts (THC)  |         |        |        |       |                | 0.083        |        |       |
| Subject variance in Slopes (THC)      | 0.000   | 0.000  |        |       |                | <b>0.004</b> | 0.000  | 0.000 |
| ARH1 rho (slope-intercept covariance) |         |        |        |       |                | --           |        |       |
| <i>Likert Upset Stomach</i>           |         |        |        |       |                |              |        |       |
| <b>Intercept</b>                      | 0.061   | 0.021  | 173.16 | 2.95  | <b>0.004</b>   | 0.020        | 0.102  |       |
| OF THC                                |         |        | 47.87  | 1.37  | 0.177          |              |        |       |
| BrAC                                  |         |        | 889.33 | -0.61 | 0.540          |              |        |       |
| <b>Time</b>                           | -0.007  | 0.003  | 886.65 | -2.42 | <b>0.016</b>   | -0.013       | -0.001 |       |
| <b>THC*BrAC</b>                       | -0.014  | 0.004  | 889.86 | -3.41 | <b>0.001</b>   | -0.023       | -0.006 |       |
| <b>Time*THC</b>                       | -0.0002 | 0.0001 | 894.36 | -1.97 | <b>0.0497</b>  | -0.0004      | 0.0000 |       |
| Time*BrAC                             |         |        | 888.49 | 0.17  | 0.868          |              |        |       |
| <b>Time*THC*BrAC</b>                  | 0.010   | 0.002  | 888.86 | 4.05  | < <b>0.001</b> | 0.005        | 0.015  |       |
| Subject Variance in Intercepts        | 0.002   | 0.001  |        |       |                | <b>0.020</b> | 0.001  | 0.004 |

| (THC)                                 |       |       |              |       |       |
|---------------------------------------|-------|-------|--------------|-------|-------|
| Subject variance in Slopes (THC)      | 0.000 | 0.000 | <b>0.010</b> | 0.000 | 0.000 |
| ARHI rho (slope-intercept covariance) |       |       | --           |       |       |

Data from 19 occasional-to-moderate cannabis smokers who participated in all dosing sessions, excluding times <1.4h post-dose. Subjective effects were measured by 100 mm visual-analogue scales (VAS) or 5-point Likert scales (Likert) with choices 0≡“none”, 1≡“slight”, 2≡“mild”, 3≡“moderate”, 4≡“severe” after drinking placebo or active alcohol (calculated to produce approximate peak 0.065% BrAC) and inhaling placebo, 2.9% THC, or 6.7% THC vaporized cannabis (500 mg, Volcano® Medic vaporizer).

Linear mixed model results; b is parameter (coefficient) estimate for each factor (negative b indicates the parameter decreases the subjective effect; positive b indicates the parameter increases the overall effect).

Overall equation: [Subjective Effect Result] = Intercept +  $b_{OF\ THC} * [THC]_{blood}$  +  $b_{BrAC} * BrAC$  +  $b_{Time} * post-dose\ time$  +  $b_{THC*BrAC} * [THC]_{OF} * BrAC$  +  $b_{Time*THC} * post-dose\ time * [THC]_{OF}$  +  $b_{Time*BrAC} * post-dose\ time * BrAC$  +  $b_{Time*THC*BrAC} * post-dose\ time * [THC]_{OF} * BrAC$

<sup>a</sup>Values in **bold** are statistically significant (p<0.05); only significant predictors are considered in the final model.

Abbreviations: SE, standard error; df, degrees of freedom; VAS, visual-analogue scale; THC, Δ<sup>9</sup>-tetrahydrocannabinol; BrAC, breath alcohol concentration.



Supplemental Table 3. Overall effect of oral fluid (OF)  $\Delta^9$ -tetrahydrocannabinol (THC) concentration ( $\mu\text{g/L}$ ), breath alcohol concentration (BrAC,  $\text{g}/210\text{L}$ ), time, and interactions (THC\*BrAC, time\*THC, time\*BrAC, time\*THC\*BrAC) on subjective effects in 19 occasional-to-moderate cannabis smokers following controlled vaporized cannabis administration with and without oral alcohol.

| Parameter                             | b       | SE <sub>b</sub> | df     | t     | p <sup>a</sup> | 95% Confidence Interval of b |             |
|---------------------------------------|---------|-----------------|--------|-------|----------------|------------------------------|-------------|
|                                       |         |                 |        |       |                | Lower Bound                  | Upper Bound |
| <i>VAS Anxious</i>                    |         |                 |        |       |                |                              |             |
| <b>Intercept</b>                      | 9.003   | 1.123           | 45.88  | 8.0   | < <b>0.001</b> | 6.742                        | 11.264      |
| OF THC                                |         |                 | 6.97   | 0.6   | 0.585          |                              |             |
| BrAC                                  |         |                 | 978.55 | 0.6   | 0.559          |                              |             |
| <b>Time</b>                           | -0.965  | 0.125           | 970.53 | -7.7  | < <b>0.001</b> | -1.210                       | -0.719      |
| THC*BrAC                              |         |                 | 942.52 | 1.0   | 0.322          |                              |             |
| <b>Time*THC</b>                       | 0.0063  | 0.0025          | 810.20 | 2.5   | <b>0.011</b>   | 0.0014                       | 0.0111      |
| Time*BrAC                             |         |                 | 974.93 | 0.4   | 0.718          |                              |             |
| <b>Time*THC*BrAC</b>                  | -0.103  | 0.050           | 876.28 | -2.1  | <b>0.037</b>   | -0.201                       | -0.006      |
| Subject Variance in Intercepts (THC)  | 13.890  | 4.984           |        |       | <b>0.005</b>   | 6.875                        | 28.062      |
| Subject variance in Slopes (THC)      |         |                 |        |       | 0.528          |                              |             |
| ARH1 rho (slope-intercept covariance) | 0.646   | 0.310           |        |       | <b>0.037</b>   | -0.268                       | 0.948       |
| <i>VAS Good Drug Effect</i>           |         |                 |        |       |                |                              |             |
| <b>Intercept</b>                      | 24.610  | 2.114           | 36.63  | 11.6  | < <b>0.001</b> | 20.325                       | 28.895      |
| <b>OF THC</b>                         | 0.0073  | 0.0026          | 10.54  | 2.8   | <b>0.017</b>   | 0.0016                       | 0.0130      |
| <b>BrAC</b>                           | 264.584 | 39.073          | 990.22 | 6.8   | < <b>0.001</b> | 187.909                      | 341.259     |
| <b>Time</b>                           | -3.401  | 0.208           | 987.76 | -16.3 | < <b>0.001</b> | -3.809                       | -2.992      |
| THC*BrAC                              |         |                 | 977.73 | 0.4   | 0.687          |                              |             |
| <b>Time*THC</b>                       | 0.0182  | 0.0040          | 867.47 | 4.5   | < <b>0.001</b> | 0.0103                       | 0.0260      |
| <b>Time*BrAC</b>                      | -57.421 | 19.932          | 988.98 | -2.9  | <b>0.004</b>   | -96.535                      | -18.306     |
| <b>Time*THC*BrAC</b>                  | -0.230  | 0.077           | 937.40 | -3.0  | <b>0.003</b>   | -0.380                       | -0.079      |
| Subject Variance in Intercepts (THC)  | 56.978  | 19.796          |        |       | <b>0.004</b>   | 28.838                       | 112.576     |
| Subject variance in Slopes (THC)      |         |                 |        |       | 0.058          | 0.000                        | 0.000       |
| ARH1 rho (slope-intercept covariance) | 0.830   | 0.142           |        |       | <b>0.000</b>   | 0.285                        | 0.970       |
| <i>VAS High</i>                       |         |                 |        |       |                |                              |             |
| <b>Intercept</b>                      | 25.628  | 2.050           | 42.01  | 12.5  | < <b>0.001</b> | 21.491                       | 29.765      |
| <b>OF THC</b>                         | 0.0115  | 0.0036          | 11.00  | 3.2   | <b>0.008</b>   | 0.0037                       | 0.0193      |
| <b>BrAC</b>                           | 195.297 | 40.951          | 991.81 | 4.8   | < <b>0.001</b> | 114.935                      | 275.658     |
| <b>Time</b>                           | -3.631  | 0.219           | 988.84 | -16.6 | < <b>0.001</b> | -4.060                       | -3.201      |
| THC*BrAC                              |         |                 | 935.55 | -0.5  | 0.620          |                              |             |
| <b>Time*THC</b>                       | 0.0187  | 0.0041          | 638.56 | 4.5   | < <b>0.001</b> | 0.0106                       | 0.0268      |
| <b>Time*BrAC</b>                      | -47.901 | 20.878          | 991.03 | -2.3  | <b>0.022</b>   | -88.870                      | -6.931      |
| <b>Time*THC*BrAC</b>                  | -0.196  | 0.079           | 787.41 | -2.5  | <b>0.013</b>   | -0.351                       | -0.041      |
| Subject Variance in Intercepts (THC)  | 49.024  | 17.353          |        |       | <b>0.005</b>   | 24.497                       | 98.108      |
| Subject variance in Slopes (THC)      | 0.000   | 0.000           |        |       | <b>0.037</b>   | 0.000                        | 0.001       |
| ARH1 rho (slope-intercept covariance) | 0.923   | 0.070           |        |       | < <b>0.001</b> | 0.596                        | 0.987       |
| <i>VAS Restless</i>                   |         |                 |        |       |                |                              |             |
| <b>Intercept</b>                      | 12.717  | 2.121           | 33.43  | 6.0   | < <b>0.001</b> | 8.405                        | 17.029      |
| OF THC                                |         |                 | 55.54  | 0.0   | 0.982          |                              |             |

|                                          |               |        |  |        |      |              |        |         |
|------------------------------------------|---------------|--------|--|--------|------|--------------|--------|---------|
|                                          | BrAC          |        |  | 977.92 | -0.2 | 0.821        |        |         |
|                                          | Time          |        |  | 971.19 | -1.3 | 0.181        |        |         |
|                                          | THC*BrAC      |        |  | 946.79 | 1.0  | 0.338        |        |         |
|                                          | Time*THC      |        |  | 994.51 | 1.4  | 0.173        |        |         |
|                                          | Time*BrAC     |        |  | 965.82 | 0.3  | 0.780        |        |         |
|                                          | Time*THC*BrAC |        |  | 995.77 | -1.1 | 0.266        |        |         |
| Subject Variance in Intercepts (THC)     | 60.781        | 20.866 |  |        |      | <b>0.004</b> | 31.014 | 119.120 |
| Subject variance in Slopes (THC)         |               |        |  |        |      | 0.312        |        |         |
| ARH1 rho<br>(slope-intercept covariance) |               |        |  |        |      | 0.653        |        |         |

*VAS Sedated*

|                                          |           |        |         |      |                |              |        |        |
|------------------------------------------|-----------|--------|---------|------|----------------|--------------|--------|--------|
| <b>Intercept</b>                         | 18.366    | 2.715  | 27.42   | 6.8  | < <b>0.001</b> | 12.799       | 23.933 |        |
|                                          | OF THC    |        | 998.87  | -1.4 | 0.174          |              |        |        |
|                                          | BrAC      |        | 990.41  | 0.4  | 0.659          |              |        |        |
| <b>Time</b>                              | -1.448    | 0.208  | 990.22  | -7.0 | < <b>0.001</b> | -1.856       | -1.041 |        |
|                                          | THC*BrAC  |        | 994.46  | 1.3  | 0.197          |              |        |        |
| <b>Time*THC</b>                          | 0.0087    | 0.0041 | 1003.97 | 2.1  | <b>0.037</b>   | 0.0005       | 0.0168 |        |
|                                          | Time*BrAC |        | 990.19  | 1.3  | 0.209          |              |        |        |
| <b>Time*THC*BrAC</b>                     | -0.159    | 0.079  | 1000.95 | -2.0 | <b>0.044</b>   | -0.313       | -0.004 |        |
| Subject Variance in Intercepts (THC)     | 18.366    | 2.715  |         |      |                | <b>0.003</b> | 12.799 | 23.933 |
| Subject variance in Slopes (THC)         |           |        | --      | --   | --             |              |        |        |
| ARH1 rho<br>(slope-intercept covariance) |           |        | --      | --   | --             |              |        |        |

*VAS Stimulated*

|                                          |         |        |        |       |                |                |         |         |
|------------------------------------------|---------|--------|--------|-------|----------------|----------------|---------|---------|
| <b>Intercept</b>                         | 23.298  | 2.282  | 29.53  | 10.2  | < <b>0.001</b> | 18.634         | 27.962  |         |
|                                          | OF THC  |        | 3.50   | 1.5   | 0.221          |                |         |         |
| <b>BrAC</b>                              | 226.775 | 35.601 | 945.07 | 6.4   | < <b>0.001</b> | 156.910        | 296.641 |         |
| <b>Time</b>                              | -2.930  | 0.188  | 978.90 | -15.6 | < <b>0.001</b> | -3.299         | -2.561  |         |
| <b>THC*BrAC</b>                          | 0.044   | 0.016  | 953.00 | 2.7   | <b>0.006</b>   | 0.012          | 0.076   |         |
| <b>Time*THC</b>                          | 0.0213  | 0.0036 | 936.20 | 5.9   | < <b>0.001</b> | 0.0142         | 0.0285  |         |
| <b>Time*BrAC</b>                         | -77.518 | 18.029 | 950.94 | -4.3  | < <b>0.001</b> | -              | -42.137 |         |
|                                          |         |        |        |       |                | 112.898        |         |         |
| <b>Time*THC*BrAC</b>                     | -0.324  | 0.069  | 936.73 | -4.7  | < <b>0.001</b> | -0.460         | -0.187  |         |
| Subject Variance in Intercepts (THC)     | 76.099  | 25.727 |        |       |                | <b>0.003</b>   | 39.229  | 147.622 |
| Subject variance in Slopes (THC)         |         |        |        |       |                | 0.245          |         |         |
| ARH1 rho<br>(slope-intercept covariance) | 0.628   | 0.162  |        |       |                | < <b>0.001</b> | 0.211   | 0.851   |

*VAS Stoned*

|                                          |          |        |        |       |                |              |         |         |
|------------------------------------------|----------|--------|--------|-------|----------------|--------------|---------|---------|
| <b>Intercept</b>                         | 23.581   | 2.219  | 36.32  | 10.6  | < <b>0.001</b> | 19.081       | 28.081  |         |
|                                          | OF THC   |        | 8.10   | 1.1   | 0.300          |              |         |         |
| <b>BrAC</b>                              | 159.548  | 40.963 | 979.29 | 3.9   | < <b>0.001</b> | 79.163       | 239.933 |         |
| <b>Time</b>                              | -3.178   | 0.218  | 984.66 | -14.6 | < <b>0.001</b> | -3.605       | -2.751  |         |
|                                          | THC*BrAC |        | 976.63 | 0.0   | 0.987          |              |         |         |
| <b>Time*THC</b>                          | 0.0166   | 0.0042 | 975.54 | 3.9   | < <b>0.001</b> | 0.0083       | 0.0250  |         |
| <b>Time*BrAC</b>                         | -55.741  | 20.971 | 978.65 | -2.7  | <b>0.008</b>   | -96.895      | -14.586 |         |
| <b>Time*THC*BrAC</b>                     | -0.212   | 0.081  | 974.10 | -2.6  | <b>0.009</b>   | -0.370       | -0.053  |         |
| Subject Variance in Intercepts (THC)     | 63.059   | 21.915 |        |       |                | <b>0.004</b> | 31.909  | 124.615 |
| Subject variance in Slopes (THC)         |          |        |        |       |                | 0.097        |         |         |
| ARH1 rho<br>(slope-intercept covariance) |          |        |        |       |                | 0.249        |         |         |

*Likert Difficulty Concentrating*

|                                          |          |        |        |        |      |                  |        |        |
|------------------------------------------|----------|--------|--------|--------|------|------------------|--------|--------|
| <b>Intercept</b>                         |          | 0.594  | 0.097  | 27.13  | 6.1  | <b>&lt;0.001</b> | 0.394  | 0.794  |
|                                          | OF THC   |        |        | 8.39   | 1.5  | 0.161            |        |        |
| <b>BrAC</b>                              |          | 7.252  | 1.376  | 989.34 | 5.3  | <b>&lt;0.001</b> | 4.552  | 9.953  |
| <b>Time</b>                              |          | -0.064 | 0.007  | 991.00 | -8.8 | <b>&lt;0.001</b> | -0.078 | -0.050 |
|                                          | THC*BrAC |        |        | 989.10 | 0.1  | 0.885            |        |        |
| <b>Time*THC</b>                          |          | 0.0003 | 0.0001 | 981.98 | 2.1  | <b>0.034</b>     | 0.0000 | 0.0006 |
| <b>Time*BrAC</b>                         |          | -1.560 | 0.701  | 988.02 | -2.2 | <b>0.026</b>     | -2.937 | -0.184 |
| <b>Time*THC*BrAC</b>                     |          | -0.006 | 0.003  | 980.15 | -2.2 | <b>0.025</b>     | -0.011 | -0.001 |
| Subject Variance in Intercepts (THC)     |          | 0.146  | 0.049  |        |      | <b>0.003</b>     | 0.076  | 0.281  |
| Subject variance in Slopes (THC)         |          |        |        |        |      | 0.087            |        |        |
| ARH1 rho<br>(slope-intercept covariance) |          | 0.659  | 0.155  |        |      | <b>&lt;0.001</b> | 0.247  | 0.869  |

*Likert Altered Sense of Time*

|                                          |           |        |        |        |      |                  |        |        |
|------------------------------------------|-----------|--------|--------|--------|------|------------------|--------|--------|
| <b>Intercept</b>                         |           | 0.473  | 0.084  | 32.21  | 5.6  | <b>&lt;0.001</b> | 0.301  | 0.645  |
|                                          | OF THC    |        |        | 10.37  | 1.8  | 0.102            |        |        |
| <b>BrAC</b>                              |           | 3.087  | 1.421  | 995.32 | 2.2  | <b>0.030</b>     | 0.297  | 5.876  |
| <b>Time</b>                              |           | -0.066 | 0.008  | 995.52 | -8.7 | <b>&lt;0.001</b> | -0.081 | -0.051 |
|                                          | THC*BrAC  |        |        | 921.42 | 0.8  | 0.444            |        |        |
| <b>Time*THC</b>                          |           | 0.0004 | 0.0001 | 524.49 | 2.6  | <b>0.008</b>     | 0.0001 | 0.0006 |
|                                          | Time*BrAC |        |        | 995.25 | 0.1  | 0.886            |        |        |
| <b>Time*THC*BrAC</b>                     |           | -0.007 | 0.003  | 688.97 | -2.6 | <b>0.010</b>     | -0.012 | -0.002 |
| Subject Variance in Intercepts (THC)     |           | 0.098  | 0.034  |        |      | <b>0.003</b>     | 0.050  | 0.192  |
| Subject variance in Slopes (THC)         |           | 0.000  | 0.000  |        |      | <b>0.034</b>     | 0.000  | 0.000  |
| ARH1 rho<br>(slope-intercept covariance) |           | 0.981  | 0.024  |        |      | <b>&lt;0.001</b> | 0.776  | 0.999  |

*Likert Slowed/Slurred Speech*

|                                          |               |        |       |        |      |                  |        |        |
|------------------------------------------|---------------|--------|-------|--------|------|------------------|--------|--------|
| <b>Intercept</b>                         |               | 0.268  | 0.056 | 38.18  | 4.8  | <b>&lt;0.001</b> | 0.154  | 0.382  |
|                                          | OF THC        |        |       | 18.85  | 1.8  | 0.091            |        |        |
| <b>BrAC</b>                              |               | 2.907  | 1.065 | 989.38 | 2.7  | <b>0.006</b>     | 0.816  | 4.997  |
| <b>Time</b>                              |               | -0.038 | 0.006 | 990.28 | -6.7 | <b>&lt;0.001</b> | -0.049 | -0.027 |
|                                          | THC*BrAC      |        |       | 990.31 | -0.8 | 0.430            |        |        |
|                                          | Time*THC      |        |       | 992.84 | 0.2  | 0.803            |        |        |
|                                          | Time*BrAC     |        |       | 989.37 | -0.1 | 0.904            |        |        |
|                                          | Time*THC*BrAC |        |       | 991.08 | 0.5  | 0.604            |        |        |
| Subject Variance in Intercepts<br>(THC)  |               |        |       | --     | --   | --               |        |        |
| Subject variance in Slopes (THC)         |               |        |       | --     | --   | --               |        |        |
| ARH1 rho (slope-intercept<br>covariance) |               |        |       | --     | --   | --               |        |        |

*Likert Body Feels Sluggish/Heavy*

|                                         |           |         |        |         |      |                  |         |        |
|-----------------------------------------|-----------|---------|--------|---------|------|------------------|---------|--------|
| <b>Intercept</b>                        |           | 0.677   | 0.089  | 33.81   | 7.6  | <b>&lt;0.001</b> | 0.496   | 0.858  |
| <b>OF THC</b>                           |           | -0.0001 | 0.0000 | 958.74  | -3.4 | <b>0.001</b>     | -0.0002 | 0.0000 |
| <b>BrAC</b>                             |           | 6.043   | 1.595  | 998.29  | 3.8  | <b>&lt;0.001</b> | 2.912   | 9.174  |
| <b>Time</b>                             |           | -0.075  | 0.008  | 996.81  | -9.0 | <b>&lt;0.001</b> | -0.092  | -0.059 |
| <b>THC*BrAC</b>                         |           | 0.002   | 0.001  | 1007.01 | 3.0  | <b>0.003</b>     | 0.001   | 0.004  |
| <b>Time*THC</b>                         |           | 0.0007  | 0.0002 | 1014.76 | 4.0  | <b>&lt;0.001</b> | 0.0003  | 0.0010 |
|                                         | Time*BrAC |         |        | 998.17  | -0.7 | 0.503            |         |        |
| <b>Time*THC*BrAC</b>                    |           | -0.011  | 0.003  | 1012.50 | -3.4 | <b>0.001</b>     | -0.017  | -0.005 |
| Subject Variance in Intercepts<br>(THC) |           |         |        | --      | --   | --               |         |        |
| Subject variance in Slopes (THC)        |           |         |        | --      | --   | --               |         |        |

|                                       |               |         |        |        |       |                  |          |          |
|---------------------------------------|---------------|---------|--------|--------|-------|------------------|----------|----------|
| ARH1 rho (slope-intercept covariance) |               |         | --     | --     | --    |                  |          |          |
| <i>Likert Feel Thirsty</i>            |               |         |        |        |       |                  |          |          |
| <b>Intercept</b>                      |               | 1.036   | 0.132  | 82.86  | 7.9   | <b>&lt;0.001</b> | 0.773    | 1.298    |
| <b>OF THC</b>                         |               | -0.0002 | 0.0001 | 25.13  | -3.0  | <b>0.006</b>     | -0.00032 | -0.00006 |
|                                       | BrAC          |         |        | 434.92 | -0.7  | 0.455            |          |          |
|                                       | Time          |         |        | 437.45 | 0.2   | 0.803            |          |          |
| <b>THC*BrAC</b>                       |               | 0.005   | 0.001  | 411.88 | 4.2   | <b>&lt;0.001</b> | 0.003    | 0.007    |
| <b>Time*THC</b>                       |               | 0.0015  | 0.0003 | 407.93 | 5.4   | <b>&lt;0.001</b> | 0.0010   | 0.0021   |
| <b>Time*BrAC</b>                      |               | 5.808   | 1.648  | 430.90 | 3.5   | <b>&lt;0.001</b> | 2.569    | 9.048    |
| <b>Time*THC*BrAC</b>                  |               | -0.023  | 0.005  | 428.57 | -4.3  | <b>&lt;0.001</b> | -0.034   | -0.013   |
| Subject Variance in Intercepts (THC)  |               | 0.122   | 0.050  |        |       | <b>0.014</b>     | 0.055    | 0.271    |
| Subject variance in Slopes (THC)      |               |         |        |        |       | 0.299            |          |          |
| ARH1 rho (slope-intercept covariance) |               |         |        |        |       | 0.581            |          |          |
| <i>Likert Dizzy</i>                   |               |         |        |        |       |                  |          |          |
| <b>Intercept</b>                      |               | 0.180   | 0.032  | 77.56  | 5.6   | <b>&lt;0.001</b> | 0.117    | 0.244    |
|                                       | OF THC        |         |        | 15.89  | 1.3   | 0.208            |          |          |
|                                       | BrAC          |         |        | 976.30 | 0.1   | 0.895            |          |          |
| <b>Time</b>                           |               | -0.024  | 0.004  | 977.01 | -5.7  | <b>&lt;0.001</b> | -0.032   | -0.016   |
|                                       | THC*BrAC      |         |        | 991.05 | -0.6  | 0.522            |          |          |
|                                       | Time*THC      |         |        | 925.95 | -0.6  | 0.517            |          |          |
|                                       | Time*BrAC     |         |        | 979.24 | -0.4  | 0.659            |          |          |
|                                       | Time*THC*BrAC |         |        | 969.93 | 0.9   | 0.353            |          |          |
| Subject Variance in Intercepts (THC)  |               | 0.008   | 0.003  |        |       | <b>0.009</b>     | 0.004    | 0.017    |
| Subject variance in Slopes (THC)      |               | 0.000   | 0.000  |        |       | <b>0.005</b>     | 0.000    | 0.000    |
| ARH1 rho (slope-intercept covariance) |               | 0.478   | 0.210  |        |       | <b>0.023</b>     | -0.013   | 0.783    |
| <i>Likert Dry Mouth or Throat</i>     |               |         |        |        |       |                  |          |          |
| <b>Intercept</b>                      |               | 0.936   | 0.096  | 44.50  | 9.7   | <b>&lt;0.001</b> | 0.742    | 1.130    |
|                                       | OF THC        |         |        | 5.95   | -1.4  | 0.199            |          |          |
|                                       | BrAC          |         |        | 994.59 | 1.4   | 0.157            |          |          |
| <b>Time</b>                           |               | -0.117  | 0.011  | 992.21 | -11.1 | <b>&lt;0.001</b> | -0.138   | -0.096   |
| <b>THC*BrAC</b>                       |               | 0.003   | 0.001  | 955.85 | 3.5   | <b>0.001</b>     | 0.001    | 0.005    |
| <b>Time*THC</b>                       |               | 0.0016  | 0.0002 | 827.72 | 7.8   | <b>&lt;0.001</b> | 0.0012   | 0.0020   |
|                                       | Time*BrAC     |         |        | 994.25 | 1.1   | 0.274            |          |          |
| <b>Time*THC*BrAC</b>                  |               | -0.020  | 0.004  | 893.64 | -5.1  | <b>&lt;0.001</b> | -0.028   | -0.012   |
| Subject Variance in Intercepts (THC)  |               | 0.106   | 0.037  |        |       | <b>0.005</b>     | 0.053    | 0.211    |
| Subject variance in Slopes (THC)      |               |         |        |        |       | 0.480            |          |          |
| ARH1 rho (slope-intercept covariance) |               | 0.652   | 0.316  |        |       | <b>0.039</b>     | -0.289   | 0.952    |
| <i>Likert Feel Hungry</i>             |               |         |        |        |       |                  |          |          |
| <b>Intercept</b>                      |               | 0.398   | 0.199  | 65.02  | 2.0   | <b>0.050</b>     | 0.000    | 0.796    |
|                                       | OF THC        |         |        | 435.03 | -1.5  | 0.147            |          |          |
|                                       | BrAC          |         |        | 431.91 | 1.0   | 0.298            |          |          |
| <b>Time</b>                           |               | 0.498   | 0.040  | 431.36 | 12.6  | <b>&lt;0.001</b> | 0.420    | 0.576    |
|                                       | THC*BrAC      |         |        | 433.29 | 1.3   | 0.208            |          |          |
|                                       | Time*THC      |         |        | 439.20 | 1.2   | 0.212            |          |          |
|                                       | Time*BrAC     |         |        | 431.62 | -0.7  | 0.481            |          |          |
|                                       | Time*THC*BrAC |         |        | 437.25 | -0.9  | 0.348            |          |          |
| Subject Variance in Intercepts        |               |         |        | --     | --    | --               |          |          |

|  |                                       |  |  |    |    |    |  |  |
|--|---------------------------------------|--|--|----|----|----|--|--|
|  | (THC)                                 |  |  |    |    |    |  |  |
|  | Subject variance in Slopes (THC)      |  |  | -- | -- | -- |  |  |
|  | ARH1 rho (slope-intercept covariance) |  |  | -- | -- | -- |  |  |

*Likert Feel Shakiness/Tremulousness*

|                  |                                       |        |       |        |      |                  |        |        |
|------------------|---------------------------------------|--------|-------|--------|------|------------------|--------|--------|
| <b>Intercept</b> |                                       | 0.105  | 0.022 | 241.61 | 4.7  | <b>&lt;0.001</b> | 0.061  | 0.149  |
|                  | OF THC                                |        |       | 7.36   | 1.5  | 0.164            |        |        |
|                  | BrAC                                  |        |       | 975.85 | -0.8 | 0.396            |        |        |
| <b>Time</b>      |                                       | -0.016 | 0.004 | 977.34 | -4.5 | <b>&lt;0.001</b> | -0.023 | -0.009 |
|                  | THC*BrAC                              |        |       | 975.86 | -0.2 | 0.854            |        |        |
|                  | Time*THC                              |        |       | 976.80 | 0.5  | 0.606            |        |        |
|                  | Time*BrAC                             |        |       | 976.13 | 1.1  | 0.256            |        |        |
|                  | Time*THC*BrAC                         |        |       | 976.30 | 0.6  | 0.560            |        |        |
|                  | Subject Variance in Intercepts (THC)  |        |       | --     | --   | --               |        |        |
|                  | Subject variance in Slopes (THC)      |        |       | --     | --   | --               |        |        |
|                  | ARH1 rho (slope-intercept covariance) |        |       | --     | --   | --               |        |        |

*Likert Nausea*

|                  |                                       |        |       |         |      |              |        |        |
|------------------|---------------------------------------|--------|-------|---------|------|--------------|--------|--------|
| <b>Intercept</b> |                                       | 0.099  | 0.032 | 46.07   | 3.1  | <b>0.003</b> | 0.035  | 0.162  |
|                  | OF THC                                |        |       | 1011.88 | -1.8 | 0.070        |        |        |
|                  | BrAC                                  |        |       | 997.10  | -1.5 | 0.142        |        |        |
| <b>Time</b>      |                                       | -0.014 | 0.003 | 996.65  | -4.1 | <b>0.000</b> | -0.020 | -0.007 |
|                  | THC*BrAC                              |        |       | 1005.44 | 1.4  | 0.158        |        |        |
|                  | Time*THC                              |        |       | 1015.98 | 1.7  | 0.087        |        |        |
|                  | Time*BrAC                             |        |       | 996.83  | 1.9  | 0.061        |        |        |
|                  | Time*THC*BrAC                         |        |       | 1015.12 | -1.5 | 0.133        |        |        |
|                  | Subject Variance in Intercepts (THC)  | --     | --    | --      | --   | --           | --     | --     |
|                  | Subject variance in Slopes (THC)      | --     | --    | --      | --   | --           | --     | --     |
|                  | ARH1 rho (slope-intercept covariance) | --     | --    | --      | --   | --           | --     | --     |

*Likert Headache*

|                  |                                       |       |       |         |      |              |       |       |
|------------------|---------------------------------------|-------|-------|---------|------|--------------|-------|-------|
| <b>Intercept</b> |                                       | 0.120 | 0.048 | 45.24   | 2.5  | <b>0.017</b> | 0.023 | 0.217 |
|                  | OF THC                                |       |       | 1012.48 | -1.8 | 0.073        |       |       |
|                  | BrAC                                  |       |       | 997.27  | -1.9 | 0.061        |       |       |
|                  | Time                                  |       |       | 996.05  | -0.1 | 0.901        |       |       |
|                  | THC*BrAC                              |       |       | 1007.83 | 1.3  | 0.200        |       |       |
|                  | Time*THC                              |       |       | 1009.41 | 1.7  | 0.094        |       |       |
|                  | Time*BrAC                             |       |       | 997.05  | 0.5  | 0.606        |       |       |
|                  | Time*THC*BrAC                         |       |       | 1013.23 | -1.1 | 0.255        |       |       |
|                  | Subject Variance in Intercepts (THC)  |       |       | --      | --   | --           |       |       |
|                  | Subject variance in Slopes (THC)      |       |       | --      | --   | --           |       |       |
|                  | ARH1 rho (slope-intercept covariance) |       |       | --      | --   | --           |       |       |

*Likert Palpitations*

|                  |        |       |       |        |     |              |       |       |
|------------------|--------|-------|-------|--------|-----|--------------|-------|-------|
| <b>Intercept</b> |        | 0.018 | 0.009 | 440.53 | 2.1 | <b>0.039</b> | 0.001 | 0.036 |
|                  | OF THC |       |       | 3.33   | 1.1 | 0.342        |       |       |
|                  | BrAC   |       |       | 994.30 | 1.5 | 0.135        |       |       |

|                             |                                       |        |       |         |      |              |        |        |
|-----------------------------|---------------------------------------|--------|-------|---------|------|--------------|--------|--------|
| <b>Time</b>                 |                                       | -0.003 | 0.001 | 987.49  | -2.1 | <b>0.035</b> | -0.006 | 0.000  |
|                             | THC*BrAC                              |        |       | 994.68  | 0.1  | 0.900        |        |        |
|                             | Time*THC                              |        |       | 990.39  | 0.9  | 0.382        |        |        |
|                             | Time*BrAC                             |        |       | 994.39  | -1.2 | 0.213        |        |        |
|                             | Time*THC*BrAC                         |        |       | 994.15  | -0.6 | 0.521        |        |        |
|                             | Subject Variance in Intercepts (THC)  |        |       | --      | --   | --           |        |        |
|                             | Subject variance in Slopes (THC)      |        |       | --      | --   | --           |        |        |
|                             | ARH1 rho (slope-intercept covariance) |        |       | --      | --   | --           |        |        |
| <i>Likert Upset Stomach</i> |                                       |        |       |         |      |              |        |        |
| <b>Intercept</b>            |                                       | 0.050  | 0.023 | 48.34   | 2.2  | <b>0.033</b> | 0.004  | 0.095  |
|                             | OF THC                                |        |       | 1011.55 | -1.6 | 0.109        |        |        |
|                             | BrAC                                  |        |       | 997.08  | -0.4 | 0.677        |        |        |
| <b>Time</b>                 |                                       | -0.007 | 0.003 | 997.06  | -2.7 | <b>0.007</b> | -0.012 | -0.002 |
|                             | THC*BrAC                              |        |       | 1005.32 | 0.7  | 0.456        |        |        |
|                             | Time*THC                              |        |       | 1008.66 | 1.7  | 0.087        |        |        |
|                             | Time*BrAC                             |        |       | 996.78  | 0.8  | 0.453        |        |        |
|                             | Time*THC*BrAC                         |        |       | 1012.68 | -0.9 | 0.361        |        |        |
|                             | Subject Variance in Intercepts (THC)  |        |       | --      | --   | --           |        |        |
|                             | Subject variance in Slopes (THC)      |        |       | --      | --   | --           |        |        |
|                             | ARH1 rho (slope-intercept covariance) |        |       | --      | --   | --           |        |        |

Data from 19 occasional-to-moderate cannabis smokers who participated in all dosing sessions. Subjective effects were measured by 100 mm visual-analogue scales (VAS) or 5-point Likert scales (Likert) with choices 0≡“none”, 1≡“slight”, 2≡“mild”, 3≡“moderate”, 4≡“severe” after drinking placebo or active alcohol (calculated to produce approximate peak 0.065% BrAC) and inhaling placebo, 2.9% THC, or 6.7% THC vaporized cannabis (500 mg, Volcano<sup>®</sup> Medic vaporizer).

Linear mixed model results; b is parameter (coefficient) estimate for each factor (negative b indicates the parameter decreases the subjective effect; positive b indicates the parameter increases the overall effect).

Overall equation: [Subjective Effect Result] = Intercept +  $b_{\text{OF THC}} \cdot [\text{THC}]_{\text{blood}}$  +  $b_{\text{BrAC}} \cdot \text{BrAC}$  +  $b_{\text{Time}} \cdot \text{post-dose time}$  +  $b_{\text{THC} \cdot \text{BrAC}} \cdot [\text{THC}]_{\text{OF}} \cdot \text{BrAC}$  +  $b_{\text{Time} \cdot \text{THC}} \cdot \text{post-dose time} \cdot [\text{THC}]_{\text{OF}}$  +  $b_{\text{Time} \cdot \text{BrAC}} \cdot \text{post-dose time} \cdot \text{BrAC}$  +  $b_{\text{Time} \cdot \text{THC} \cdot \text{BrAC}} \cdot \text{post-dose time} \cdot [\text{THC}]_{\text{OF}} \cdot \text{BrAC}$

<sup>a</sup>Values in **bold** are statistically significant (p<0.05); only significant predictors are considered in the final model.

Abbreviations: SE, standard error; df, degrees of freedom; VAS, visual-analogue scale; THC,  $\Delta^9$ -tetrahydrocannabinol; BrAC, breath alcohol concentration.

Supplemental Table 4. Median [range] (N) oral fluid (OF)/blood and OF/plasma  $\Delta^9$ -tetrahydrocannabinol (THC), 11-nor-9-carboxy-THC (THCCOOH), cannabidiol (CBD) and cannabiniol (CBN) ratios by time point after controlled vaporized cannabis and low-dose oral alcohol to healthy adult occasional-to-moderate cannabis smokers.

| Time Post-Dose (h) | No Alcohol             |                         |                        | Alcohol                |                        |                        |
|--------------------|------------------------|-------------------------|------------------------|------------------------|------------------------|------------------------|
|                    | Placebo                | Low 2.9% THC            | High 6.7% THC          | Placebo                | Low 2.9% THC           | High 6.7% THC          |
| OF/Blood THC       |                        |                         |                        |                        |                        |                        |
| -0.8               | 4.0 [0.5-8.2]<br>(5)   | 4.9 [3.3-7.1]<br>(3)    | 1.6 [1.1-2.2]<br>(2)   | 2.2 [0.8-9.0]<br>(3)   | 5.2 [1.3-6.4]<br>(4)   | 2.6 [2.0-8.3]<br>(3)   |
| 0.17               | 2.9 [0.4-10.0]<br>(17) | 19.6 [0.8-840]<br>(19)  | 27.1 [1.6-887]<br>(19) | 2.9 [1.4-30.7]<br>(9)  | 23.0 [1.9-256]<br>(19) | 16.5 [0.7-723]<br>(19) |
| 1.4                | 1.7 [0.8-7.9]<br>(6)   | 15.4 [0.9-225]<br>(18)  | 27.8 [1.7-227]<br>(18) | 1.8 [1.2-36.4]<br>(5)  | 20.8 [1.5-417]<br>(19) | 26.7 [1.3-444]<br>(19) |
| 2.3                | 1.6 [0.7-8.9]<br>(6)   | 18.9 [0.8-133]<br>(17)  | 21.5 [0.8-253]<br>(15) | 2.0 [1.8-4.4]<br>(3)   | 16.4 [4.0-214]<br>(16) | 24.2 [1.0-452]<br>(16) |
| 3.3                | 1.7 [1.5-2.7]<br>(4)   | 15.7 [2.3-110]<br>(12)  | 9.6 [0.9-174]<br>(15)  | 1.5 [1.3-4.6]<br>(4)   | 11.9 [2.8-168]<br>(14) | 33.5 [3.2-203]<br>(13) |
| 6.3                | 0.8 [0.3-1.7]<br>(5)   | 3.7 [0.7-15.3]<br>(8)   | 7.1 [1.1-15.7]<br>(7)  | 1.2 [0.3-1.4]<br>(3)   | 4.9 [0.9-31.1]<br>(7)  | 8.5 [2.1-55.9]<br>(9)  |
| 8.3                | 0.5 [0.3-1.8]<br>(3)   | 1.6 [0.7-49.4]<br>(8)   | 1.8 [1.3-10.1]<br>(5)  | 0.9 [0.3-2.0]<br>(4)   | 3.7 [1.2-29.9]<br>(5)  | 5.3 [0.8-28.5]<br>(7)  |
| OF/Plasma THC      |                        |                         |                        |                        |                        |                        |
| -0.8               | 5.1 [0.6-8.2]<br>(6)   | 5.9 [3.1-13.2]<br>(5)   | 1.4 [1.0-8.4]<br>(4)   | 2.5 [0.6-7.7]<br>(5)   | 2.5 [0.7-5.5]<br>(5)   | 4.8 [1.9-20.1]<br>(4)  |
| 0.17               | 1.9 [0.3-7.5]<br>(18)  | 15.5 [0.5-505]<br>(19)  | 21.0 [1.0-585]<br>(19) | 2.8 [0.4-22.2]<br>(11) | 14.8 [1.5-156]<br>(19) | 11.5 [0.4-463]<br>(19) |
| 1.4                | 1.9 [1.1-6.8]<br>(5)   | 11.3 [0.6-159]<br>(18)  | 17.6 [1.4-166]<br>(18) | 2.0 [1.1-32.5]<br>(5)  | 16.2 [0.9-359]<br>(19) | 18.6 [0.9-319]<br>(19) |
| 2.3                | 1.8 [1.4-6.0]<br>(5)   | 13.0 [0.5-90.1]<br>(17) | 15.0 [0.5-144]<br>(16) | 1.5 [1.2-4.9]<br>(5)   | 12.5 [2.3-186]<br>(17) | 20.7 [0.8-315]<br>(18) |
| 3.3                | 1.6 [1.3-4.3]<br>(5)   | 7.7 [1.2-80.5]<br>(13)  | 8.7 [0.7-139]<br>(15)  | 1.3 [0.9-1.4]<br>(3)   | 9.8 [2.1-188]<br>(17)  | 19.7 [0.5-129]<br>(16) |
| 6.3                | 0.9 [0.3-1.2]<br>(6)   | 1.8 [0.5-15.3]<br>(7)   | 4.3 [0.8-62.2]<br>(11) | 1.2 [0.2-1.3]<br>(4)   | 4.6 [0.5-35.0]<br>(10) | 5.7 [0.6-47.7]<br>(10) |
| 8.3                | 0.5 [0.2-1.5]<br>(5)   | 1.5 [0.4-33.7]<br>(9)   | 4.0 [0.9-46.3]<br>(7)  | 0.5 [0.2-0.8]<br>(4)   | 2.6 [0.4-21.8]<br>(8)  | 4.6 [1.0-20.6]<br>(9)  |
| OF/Blood THCCOOH   |                        |                         |                        |                        |                        |                        |
| -0.8               | 4.0 [1.5-10.5]<br>(8)  | 3.0 [2.5-7.7]<br>(7)    | 3.8 [1.2-7.7]<br>(7)   | 3.9 [2.1-8.0]<br>(6)   | 4.0 [1.8-12.1]<br>(6)  | 3.7 [1.9-8.8]<br>(7)   |
| 0.17               | 2.5 [1.2-7.9]<br>(6)   | 3.2 [2.8-4.2]<br>(7)    | 2.8 [0.7-3.8]<br>(8)   | 3.8 [2.0-7.0]<br>(7)   | 3.6 [1.3-12.5]<br>(8)  | 2.9 [0.6-11.6]<br>(9)  |
| 1.4                | 3.4 [1.2-9.0]<br>(7)   | 2.6 [1.9-9.7]<br>(8)    | 3.0 [1.2-8.7]<br>(9)   | 4.9 [2.2-8.9]<br>(9)   | 4.6 [2.1-17.0]<br>(12) | 4.8 [1.9-20.9]<br>(11) |
| 2.3                | 4.8 [1.4-7.2]<br>(6)   | 3.4 [1.8-7.9]<br>(9)    | 3.5 [2.4-11.1]<br>(8)  | 6.2 [3.2-10.1]<br>(7)  | 4.7 [2.6-13.6]<br>(11) | 4.5 [2.2-17.9]<br>(12) |
| 3.3                | 3.1 [1.3-5.7]<br>(6)   | 3.2 [2.1-5.6]<br>(10)   | 2.8 [1.3-7.2]<br>(10)  | 4.7 [2.1-5.8]<br>(7)   | 4.3 [2.4-14.3]<br>(10) | 4.4 [1.3-19.6]<br>(9)  |
| 6.3                | 3.8 [2.1-5.9]<br>(6)   | 4.3 [1.7-11.5]<br>(9)   | 3.2 [1.9-5.3]<br>(9)   | 4.3 [3.0-13.4]<br>(7)  | 4.5 [1.5-12.3]<br>(11) | 3.5 [2.7-9.7]<br>(8)   |
| 8.3                | 3.7 [2.8-11.7]<br>(4)  | 4.7 [2.0-5.8]<br>(8)    | 3.1 [1.5-6.3]<br>(8)   | 4.0 [2.1-8.1]<br>(6)   | 5.0 [1.5-9.8]<br>(8)   | 2.9 [2.2-6.1]<br>(8)   |
| OF/Plasma THCCOOH  |                        |                         |                        |                        |                        |                        |
| -0.8               | 2.7 [1.0-6.3]          | 1.7 [1.2-4.7]           | 2.0 [0.7-3.6]          | 2.7 [1.5-5.0]          | 2.7 [1.1-6.8]          | 2.3 [1.7-5.1]          |

|               |               |                |                 |               |                |                  |
|---------------|---------------|----------------|-----------------|---------------|----------------|------------------|
|               | (8)           | (7)            | (7)             | (7)           | (6)            | (7)              |
| 0.17          | 1.6 [1.0-4.5] | 2.1 [1.7-2.8]  | 1.9 [0.5-2.6]   | 2.6 [1.6-4.8] | 2.1 [0.8-7.1]  | 1.8 [0.4-7.6]    |
|               | (6)           | (7)            | (8)             | (7)           | (8)            | (9)              |
| 1.4           | 2.7 [0.9-5.7] | 1.8 [1.3-6.6]  | 1.9 [0.8-4.3]   | 3.2 [1.4-5.9] | 3.2 [1.1-10.6] | 3.5 [1.1-13.3]   |
|               | (7)           | (8)            | (9)             | (9)           | (12)           | (11)             |
| 2.3           | 3.3 [1.1-4.6] | 2.3 [1.1-4.6]  | 2.8 [1.4-5.5]   | 3.9 [2.0-7.0] | 3.1 [1.8-8.8]  | 3.0 [1.2-11.1]   |
|               | (6)           | (9)            | (8)             | (7)           | (11)           | (12)             |
| 3.3           | 2.0 [1.0-3.6] | 2.0 [0.9-4.0]  | 2.0 [0.7-3.4]   | 3.2 [1.2-4.8] | 3.0 [1.6-7.9]  | 2.5 [0.8-12.4]   |
|               | (6)           | (10)           | (10)            | (7)           | (10)           | (9)              |
| 6.3           | 2.5 [1.4-4.0] | 3.5 [1.1-8.3]  | 2.0 [1.0-3.4]   | 2.8 [2.0-9.3] | 2.8 [1.0-8.8]  | 2.4 [1.9-6.4]    |
|               | (6)           | (9)            | (9)             | (7)           | (11)           | (8)              |
| 8.3           | 2.3 [1.9-7.0] | 3.2 [1.3-3.7]  | 1.9 [0.8-4.0]   | 2.7 [1.6-5.1] | 3.3 [1.0-5.8]  | 2.0 [1.4-3.8]    |
|               | (5)           | (8)            | (8)             | (6)           | (8)            | (8)              |
| OF/Blood CBD  |               |                |                 |               |                |                  |
| -0.8          | --            | --             | --              | --            | --             | --               |
| 0.17          |               |                | 45.2 [2.5-183]  |               |                | 32.8 [10.6-1607] |
|               |               |                | (10)            |               |                | (13)             |
| 1.4           | --            | --             | --              | --            | --             | --               |
| 2.3           | --            | --             | --              | --            | --             | --               |
| 3.3           | --            | --             | --              | --            | --             | --               |
| 6.3           | --            | --             | --              | --            | --             | --               |
| 8.3           | --            | --             | --              | --            | --             | --               |
| OF/Plasma CBD |               |                |                 |               |                |                  |
| -0.8          | --            | --             | --              | --            | --             | --               |
| 0.17          |               |                | 56.5 [2.2-1015] |               |                | 25.6 [8.6-1060]  |
|               |               |                | (12)            |               |                | (16)             |
| 1.4           | --            | --             | --              | --            | --             | --               |
| 2.3           | --            | --             | --              | --            | --             | --               |
| 3.3           | --            | --             | --              | --            | --             | --               |
| 6.3           | --            | --             | --              | --            | --             | --               |
| 8.3           | --            | --             | --              | --            | --             | --               |
| OF/Blood CBN  |               |                |                 |               |                |                  |
| -0.8          | --            | --             | --              | --            | --             | --               |
| 0.17          | 1.5           | 20.7 [1.0-173] | 36.7 [2.0-120]  | 38.9          | 29.0 [1.4-192] | 28.2 [5.1-947]   |
|               | (1)           | (11)           | (9)             | (1)           | (16)           | (14)             |
| 1.4           | --            | --             | --              | --            | --             | --               |
| 2.3           | --            | --             | --              | --            | --             | --               |
| 3.3           | --            | --             | --              | --            | --             | --               |
| 6.3           | --            | --             | --              | --            | --             | --               |
| 8.3           | --            | --             | --              | --            | --             | --               |
| OF/Plasma CBN |               |                |                 |               |                |                  |
| -0.8          | --            | --             | --              | --            | --             | --               |
| 0.17          | 1.3           | 10.3 [0.8-640] | 60.5 [1.7-118]  | 43.5          | 29.8 [1.7-166] | 20.2 [5.3-828]   |
|               | (1)           | (14)           | (10)            | (1)           | (15)           | (15)             |
| 1.4           | --            | --             | --              | --            | --             | --               |
| 2.3           | --            | --             | --              | --            | --             | --               |
| 3.3           | --            | --             | --              | --            | --             | --               |
| 6.3           | --            | --             | --              | --            | --             | --               |
| 8.3           | --            | --             | --              | --            | --             | --               |

Alcohol administration: oral placebo or active alcohol (calculated to produce approximate peak 0.065% BrAC).

Cannabis administration: inhaled placebo, 2.9% THC, or 6.7% THC vaporized cannabis (500 mg, Volcano<sup>®</sup> Medic vaporizer). Data from 19 occasional-to-moderate cannabis smokers who participated in all dosing sessions. N represents number of paired-positive specimens contributing to the result.

Abbreviations: OF, oral fluid; THC,  $\Delta^9$ -tetrahydrocannabinol; THCCOOH, 11-nor-9-carboxy-THC; CBD, cannabidiol; CBN, cannabinol.



Supplemental Table 5. (To accompany Figure 3): Regression equations and slope comparisons for (A) oral fluid (OF)  $\Delta^9$ -tetrahydrocannabinol (THC) versus blood THC concentration, and (B) OF versus plasma THC concentration after low (2.9% THC) and high (6.7% THC) dose vaporized cannabis administration with and without oral alcohol to 19 healthy, adult occasional-to-moderate cannabis smokers.

A) OF versus Blood THC Figure 3A Regression Equations

|                                          | Low (2.9% THC)                                 | High (6.7% THC)                                | $p_{\text{high-low}}$ (slopes)        |
|------------------------------------------|------------------------------------------------|------------------------------------------------|---------------------------------------|
| No Alcohol                               | $y = 34.12x + 104.5$<br>$R^2 = 0.075, N = 130$ | $y = 43.40x + 85.52$<br>$R^2 = 0.184, N = 130$ | 0.5123                                |
| Alcohol                                  | $y = 34.60x + 40.58$<br>$R^2 = 0.324, N = 131$ | $y = 80.65x + 210.3$<br>$R^2 = 0.153, N = 131$ | 0.0866                                |
| $p_{\text{alcohol-no alcohol}}$ (slopes) | 0.9646                                         | 0.0745                                         | Overall p (slopes, all doses): 0.0171 |

B) OF versus Plasma THC Figure 3B Regression Equations

|                                          | Low (2.9% THC)                                 | High (6.7% THC)                                | $p_{\text{high-low}}$ (slopes)        |
|------------------------------------------|------------------------------------------------|------------------------------------------------|---------------------------------------|
| No Alcohol                               | $y = 25.20x + 91.54$<br>$R^2 = 0.087, N = 130$ | $y = 28.98x + 92.24$<br>$R^2 = 0.192, N = 130$ | 0.6925                                |
| Alcohol                                  | $y = 24.76x + 35.60$<br>$R^2 = 0.333, N = 131$ | $y = 50.41x + 282.3$<br>$R^2 = 0.141, N = 131$ | 0.1725                                |
| $p_{\text{alcohol-no alcohol}}$ (slopes) | 0.9534                                         | 0.1183                                         | Overall p (slopes, all doses): 0.0668 |

N represents number of specimen pairs.
